# Supplementary material for: Molecular Diagnosis of Chagas Disease in Colombia: Parasitic Loads and Discrete Typing Units in Patients from Acute and Chronic Phases
Source: PubMed Central journal article supplement (PMC5029947; doi:10.1371/journal.pntd.0004997), 2016-09-20

|                                                                                   |                                                                      |  |
|-----------------------------------------------------------------------------------|----------------------------------------------------------------------|--|
|  | <b>PROTOCOLOS DE INVESTIGACIÓN</b><br><br><b>RED CHAGAS COLOMBIA</b> |  |
| Elaborado por:<br>Juan David Ramírez<br>Coordinador CCDM<br>RED CHAGAS COLOMBIA   | Revisado por:<br>Zulma Cucunubá<br>Gerente<br>RED CHAGAS COLOMBIA    |  |

## TÍTULO DEL PROYECTO

**Caracterización de una cohorte de pacientes con enfermedad de Chagas, su tratamiento etiológico, eventos adversos y respuesta terapéutica**

## INVESTIGADOR PRINCIPAL

|                         |                                                                |
|-------------------------|----------------------------------------------------------------|
| Nombre completo:        | Zulma Milena Cucunubá Pérez                                    |
| Cédula                  | 33367567                                                       |
| Institución             | UT- Red Chagas Colombia                                        |
| Teléfono fijo y celular | 3208408971                                                     |
| correo electrónico      | <a href="mailto:zcucunuba@ins.gov.co">zcucunuba@ins.gov.co</a> |
| Dirección               | Calle 22 Bis No. 48-40                                         |

## CO-INVESTIGADORES

|                         |                                                            |
|-------------------------|------------------------------------------------------------|
| Nombre completo:        | Astrid Carolina Flórez Sánchez                             |
| Cédula                  | 51866117                                                   |
| Institución             | Instituto Nacional de Salud                                |
| Teléfono fijo y celular | (1) 2304513 – 3108039570                                   |
| correo electrónico      | <a href="mailto:aflorez@ins.gov.co">aflorez@ins.gov.co</a> |
| Dirección               | Cra. 69 D No. 1-60 Torre 3 Apto 13-02                      |

|                         |                                                                  |
|-------------------------|------------------------------------------------------------------|
| Nombre completo:        | Nubia Lucia Roa Buitrago                                         |
| Cédula                  | 35458010                                                         |
| Institución             | Hospital Universitario San Ignacio                               |
| Teléfono fijo y celular | 3115616407                                                       |
| correo electrónico      | <a href="mailto:nroa@javeriana.edu.co">nroa@javeriana.edu.co</a> |
| Dirección               |                                                                  |

|                         |                                                                      |
|-------------------------|----------------------------------------------------------------------|
| Nombre completo:        | Diana Carolina Hernández Castro                                      |
| Cédula                  | 1.030.546.278                                                        |
| Institución             | UT-Red Chagas Colombia                                               |
| Teléfono fijo y celular | 3167447716                                                           |
| correo electrónico      | <a href="mailto:dcahernandezc@gmail.com">dcahernandezc@gmail.com</a> |
| Dirección               | Calle 23 B No. 113-32                                                |

|                         |                                                              |
|-------------------------|--------------------------------------------------------------|
| Nombre completo:        | Mario Javier Olivera                                         |
| Cédula                  | 1.032.380.726                                                |
| Institución             | Instituto Nacional de Salud                                  |
| Teléfono fijo y celular | 3178949657                                                   |
| correo electrónico      | <a href="mailto:Molivera@ins.gov.co">Molivera@ins.gov.co</a> |
| Dirección               | Calle 26 No. 50-26                                           |

|                                                                                   |                                                                      |  |
|-----------------------------------------------------------------------------------|----------------------------------------------------------------------|--|
|  | <b>PROTOCOLOS DE INVESTIGACIÓN</b><br><br><b>RED CHAGAS COLOMBIA</b> |  |
| Elaborado por:<br>Juan David Ramírez<br>Coordinador CCDM<br>RED CHAGAS COLOMBIA   | Revisado por:<br>Zulma Cucunubá<br>Gerente<br>RED CHAGAS COLOMBIA    |  |

|                         |                                                                  |
|-------------------------|------------------------------------------------------------------|
| Nombre completo:        | Rafael Herazo                                                    |
| Cédula                  | 8853944                                                          |
| Institución             | UT-Red Chagas Colombia                                           |
| Teléfono fijo y celular | 3206733903                                                       |
| correo electrónico      | <a href="mailto:rahetaamd@hotmail.com">rahetaamd@hotmail.com</a> |
| Dirección               | Cra. 113 A No.78-74                                              |

|                         |                                                                          |
|-------------------------|--------------------------------------------------------------------------|
| Nombre completo:        | Juan David Ramírez González                                              |
| Cédula                  | 1011716118                                                               |
| Institución             | UT-Red Chagas Colombia                                                   |
| Teléfono fijo y celular | 3188270427                                                               |
| correo electrónico      | <a href="mailto:ccdm.red.chagas@gmail.com">ccdm.red.chagas@gmail.com</a> |
| Dirección               | Cra. 51 No. 134-67                                                       |

**OBJETIVO GENERAL:** Caracterizar un grupo de pacientes con enfermedad de Chagas, su tratamiento etiológico, eventos adversos y respuesta terapéutica.

**OBJETIVOS ESPECÍFICOS:**

1. Caracterizar un grupo de pacientes con enfermedad de Chagas en fase crónica en Colombia, quienes han recibido tratamiento etiológico.
2. Describir la seguridad y tolerabilidad del medicamento (Benzonidazol ó Nifurtimox), determinada por la frecuencia y distribución de los efectos adversos relacionados.
3. Caracterizar la respuesta al tratamiento etiológico medida por desenlaces clínicos (ecocardiograma), serológicos (IgG anti-T.cruzi) y parasitológicos (PCR)

**METODOLOGÍA OBJETIVO ESPECÍFICO 1:**

Objetivo 1: *Caracterizar un grupo de pacientes con enfermedad de Chagas en fase crónica en Colombia, quienes han recibido tratamiento etiológico.*

**Definición operacional de las variables Objetivo 1**

| Variable            | Definición conceptual    | Definición operacional                                     | Tipo de variable y escala de medición | Referencia bibliográfica /comentario |
|---------------------|--------------------------|------------------------------------------------------------|---------------------------------------|--------------------------------------|
| Fecha de nacimiento | dd/mm/aaaa de nacimiento | dd/mm/aaaa registrado en el documento de identificación de | Cualitativa Nominal                   | NA                                   |

|                                                                                   |                                                                      |  |
|-----------------------------------------------------------------------------------|----------------------------------------------------------------------|--|
|  | <b>PROTOCOLOS DE INVESTIGACIÓN</b><br><br><b>RED CHAGAS COLOMBIA</b> |  |
| Elaborado por:<br>Juan David Ramírez<br>Coordinador CCDM<br>RED CHAGAS COLOMBIA   | Revisado por:<br>Zulma Cucunubá<br>Gerente<br>RED CHAGAS COLOMBIA    |  |

|                                                                                      |                                                                                                                                                                  |                                                                                                                                                                                                                            |                                |                                                                                                            |
|--------------------------------------------------------------------------------------|------------------------------------------------------------------------------------------------------------------------------------------------------------------|----------------------------------------------------------------------------------------------------------------------------------------------------------------------------------------------------------------------------|--------------------------------|------------------------------------------------------------------------------------------------------------|
|                                                                                      |                                                                                                                                                                  | referencia del paciente.                                                                                                                                                                                                   |                                |                                                                                                            |
| <b>Edad</b>                                                                          | Tiempo vivido por una persona desde el nacimiento.                                                                                                               | Edad expresada en años cumplidos basándose en la fecha de nacimiento registrada en documento de identificación de referencia para el paciente (Registro civil, tarjeta de identidad o Cedula de ciudadanía).               | Cuantitativa discreta<br>Razón | NA                                                                                                         |
| <b>Sexo</b>                                                                          | Variable biológica que diferencia al hombre de la mujer.                                                                                                         | Se registra Masculino o Femenino de acuerdo a lo anotado en la HC.                                                                                                                                                         | Cualitativa Dicotómica Nominal | NA                                                                                                         |
| <b>Etnia</b>                                                                         | Grupo humano que comparte y reconoce como propias ciertas características culturales específicas, que determinan su identidad (ethos) frente a otros colectivos. | Se registra la pertenencia a alguno de los siguientes grupos étnicos: Indígena, Mestizo, Afrocolombiano, Blanco, Raizal, Gitano, Mulato u otro, basándose a lo registrado en la HC durante la entrevista clínica.          | Cualitativa Politómica Nominal | Dane, 2007*                                                                                                |
| <b>Fecha de confirmación diagnóstica</b>                                             | dd/mm/aaaa en que se confirma el diagnóstico serológico de infección por T. cruzi.                                                                               | dd/mm/aaaa de recepción del 2do resultado serológico que confirma el diagnóstico o 3er resultado en caso de dos discordantes.                                                                                              | Cualitativa Nominal            | Se relaciona con la demora para inicio de tto etiológico y con el tiempo pos-tto para análisis prospectivo |
| <b>Fecha de inicio de tratamiento etiológico.</b>                                    | dd/mm/aaaa de inicio de tratamiento etiológico para infección por T.cruzi.                                                                                       | dd/mm/aaaa de inicio de tratamiento etiológico con Benzonidazol o Nifurtimox.                                                                                                                                              | Cualitativa Nominal            |                                                                                                            |
| <b>Procedencia</b>                                                                   |                                                                                                                                                                  |                                                                                                                                                                                                                            |                                |                                                                                                            |
| <b>Municipio/departamento de Nacimiento.</b>                                         | Entidad fundamental de la División Política Administrativa del Estado. Pertenecer a un departamento.                                                             | Identificación del municipio/departamento de nacimiento basándose en los registros de la HC o el documento de identificación de referencia para el paciente (Registro civil, tarjeta de identidad o Cedula de ciudadanía). | Cualitativa Politómica Nominal | Dane, 2007*                                                                                                |
| <b>Municipio/departamento de Expedición de la Cedula de ciudadanía. (&gt;18años)</b> | Entidad fundamental de la División Política Administrativa del Estado. Pertenecer a un departamento.                                                             | Identificación del municipio/departamento de expedición de la cedula de ciudadanía a través de la observación directa de este documento en los pacientes >18años.                                                          | Cualitativa Politómica Nominal | Dane, 2007*<br>Villar JC, 2009.                                                                            |
| <b>Municipio/departamento de residencia.</b>                                         | Entidad fundamental de la División Política Administrativa del Estado. Pertenecer a un departamento.                                                             | Municipio/departamento de residencia al momento del registro médico, información obtenida de la HC.                                                                                                                        | Cualitativa Politómica Nominal | Dane, 2007*                                                                                                |
| <b>Antecedentes</b>                                                                  |                                                                                                                                                                  |                                                                                                                                                                                                                            |                                |                                                                                                            |
| <b>Nivel</b>                                                                         | Grado de escolaridad                                                                                                                                             | Ninguno                                                                                                                                                                                                                    | Cualitativa                    | Dane, 2007*                                                                                                |

|                                                                                   |                                                                      |  |
|-----------------------------------------------------------------------------------|----------------------------------------------------------------------|--|
|  | <b>PROTOCOLOS DE INVESTIGACIÓN</b><br><br><b>RED CHAGAS COLOMBIA</b> |  |
| Elaborado por:<br>Juan David Ramírez<br>Coordinador CCDM<br>RED CHAGAS COLOMBIA   | Revisado por:<br>Zulma Cucunubá<br>Gerente<br>RED CHAGAS COLOMBIA    |  |

|                                                                  |                                                                                                 |                                                                                                                                                                                                |                                      |                                               |
|------------------------------------------------------------------|-------------------------------------------------------------------------------------------------|------------------------------------------------------------------------------------------------------------------------------------------------------------------------------------------------|--------------------------------------|-----------------------------------------------|
| <b>educativo</b>                                                 | más alto al cual ha llegado la persona de acuerdo con los niveles del sistema educativo formal. | Preescolar<br>Primaria (completo-incompleto)<br>Secundaria (completo-incompleto)<br>Técnico. (completo-incompleto)<br>Tecnológico. (completo-incompleto)<br>Profesional. (completo-incompleto) | Politómica<br>Nominal                |                                               |
| <b>Familiar(es) con Dx Chagas confirmado</b>                     | Familiar(es) del paciente con Dx de Chagas confirmado.                                          | Determinar durante la entrevista clínica y la revisión de la HC antecedentes de familiares con diagnóstico de Chagas confirmado.<br>Si - No                                                    | Cualitativa<br>dicotómica            | Rosas et al, 2002<br><br>Cucunubá et al, 2012 |
| <b>Parentesco de los familiares con Dx de Chagas confirmado.</b> | Consanguinidad o afinidad existente entre cada uno de los miembros del hogar y el paciente.     | Algún familiar del paciente con Enfermedad de Chagas.<br>Padre, madre, hermano(a), hijo(a),<br>Enumerar otros                                                                                  | Cualitativa<br>Politómica<br>Nominal | Rosas et al, 2002<br><br>Cucunubá et al, 2012 |
| <b>Familiares con dispositivo cardiaco</b>                       | Familiar(es) del paciente que usan o usaron dispositivo cardiaco.                               | Algún familiar con antecedente de uso de dispositivo cardiaco:<br>Marcapaso<br>Desfibrilador<br>Si - No                                                                                        | Cualitativa<br>Dicotómica<br>Nominal | NA                                            |
| <b>Muerte súbita en familiares</b>                               | Cese repentino e irreversible de todas las funciones biológicas.                                | Referencia de muerte súbita en algún familiar. ¿ha muerto algún familiar de manera súbita (repentino, inesperado)?<br>Si - No                                                                  | Cualitativa<br>Dicotómica<br>Nominal |                                               |
| <b>Medicamentos de uso crónico</b>                               | Medicamentos de uso crónico por el paciente.                                                    | Determinar durante la entrevista clínica o en la HC, uso de medicamentos para enfermedad crónica.<br>No usa<br>Captopril<br>Digoxina<br>ASA<br>Pednisolona<br>Salbutamol                       | Cualitativa<br>Politómica<br>Nominal | Rosas et al, 2002                             |
| <b>Co-morbilidades crónicas</b>                                  | Enfermedades asociadas en el paciente con Chagas.                                               | Enumerar co-morbilidades referenciadas diferentes a HTA y Falla Cardíaca. Puede ser:<br>Sin co-morbilidades<br>Diabetes<br>Asma<br>Artritis                                                    | Cualitativa<br>Politómica<br>Nominal |                                               |
| <b>Transfusión / donación sanguínea</b>                          | Procedimiento médico en donde una persona recibe o dona sangre.                                 | Referencia en HC de recepción y/o donación de transfusión sanguínea en algún momento de la vida<br>Ninguna<br>Recepción<br>Donación<br>Donación y recepción                                    | Cualitativa<br>Politómica<br>Nominal |                                               |
| <b>Año que</b>                                                   | Año en que el paciente                                                                          | Expresado en aaaa. (ej, 1993)                                                                                                                                                                  | Cuantitativa                         | NA                                            |

|                                                                                   |                                                                      |  |
|-----------------------------------------------------------------------------------|----------------------------------------------------------------------|--|
|  | <b>PROTOCOLOS DE INVESTIGACIÓN</b><br><br><b>RED CHAGAS COLOMBIA</b> |  |
| Elaborado por:<br>Juan David Ramírez<br>Coordinador CCDM<br>RED CHAGAS COLOMBIA   | Revisado por:<br>Zulma Cucunubá<br>Gerente<br>RED CHAGAS COLOMBIA    |  |

|                                     |                                                                                                                                            |                                                                                                                                                                                                                           |                                      |                                                                                                                                                |
|-------------------------------------|--------------------------------------------------------------------------------------------------------------------------------------------|---------------------------------------------------------------------------------------------------------------------------------------------------------------------------------------------------------------------------|--------------------------------------|------------------------------------------------------------------------------------------------------------------------------------------------|
| <b>recibió transfusión</b>          | con Chagas recibió por 1era vez alguna transfusión.                                                                                        |                                                                                                                                                                                                                           | Discreta<br>De razón                 |                                                                                                                                                |
| <b>Año que realizó donación</b>     | Año en que el paciente con Chagas realizó por última vez alguna donación.                                                                  | Expresado en aaaa. (ej, 1999)                                                                                                                                                                                             | Cuantitativa<br>Discreta<br>De razón | NA                                                                                                                                             |
| <b>Atopia</b>                       | Tendencia a desarrollar respuestas de Ac IgE a proteínas ambientales. Enfermedades asociadas con Atopia (eczema, asma y rinitis alérgica). | Antecedente de alguna de las siguientes enfermedades en cualquier momento:<br>Dermatitis atópica<br>Rinitis alérgica<br>Asma.<br>Si – No                                                                                  | Cualitativa<br>Dicotómica<br>Nominal | Avila et al, 2008<br><br>Variable enfocada a establecer la relación entre el antecedente y la presencia de eventos adversos al tto etiológico. |
| <b>Colelitiasis</b>                 | Presencia de cálculos en la vesícula biliar.                                                                                               | Referencia de colelitiasis con o sin tratamiento quirúrgico.<br>Si – No                                                                                                                                                   | Cualitativa<br>Dicotómica<br>Nominal | Crema et al, 2011.<br><br>Matsuda et al, 2009                                                                                                  |
| <b>HTA</b>                          | Elevación de la tensión arterial $\geq 140$ PAS o $\geq 90$ PAD.                                                                           | Antecedente de HTA registrado en la HC.<br>Si – No                                                                                                                                                                        | Cualitativa<br>Dicotómica<br>Nominal | Chobanian et al, 2003<br>Ianni et al, 1998                                                                                                     |
| <b>Presión arterial</b>             | Elevación de la tensión arterial $\geq 140$ PAS o $\geq 90$ PAD.                                                                           | Cifras de tensión arterial registradas en la HC.<br>PAS $< 120$ y PAD $< 80$ (Normal)<br>PAS 120-139 o PAD 80-89 (Pre hipertenso)<br>PAS 140-159 o PAD 90-99 (HTA Estadio I)<br>PAS $> 160$ o PAD $> 100$ (HTA Estadio 2) | Cualitativa<br>Ordinal               | Chobanian et al, 2003<br><br>Ianni et al, 1998                                                                                                 |
| <b>Falla cardiaca</b>               | Incapacidad del corazón de bombear sangre en los volúmenes adecuados.                                                                      | Historia de insuficiencia cardiaca.<br>Si – No                                                                                                                                                                            | Cualitativa<br>Dicotómica<br>Nominal | Greenberg B & Kahn AM, 2011                                                                                                                    |
| <b>Clasificación falla cardiaca</b> | Estado de deterioro de la función cardiaca y su repercusión clínica y factores de riesgo.                                                  | Determinar Estadios por la HC:<br>A, B, C, D                                                                                                                                                                              | Cualitativa<br>Ordinal               | Hunt et al, 2005<br><br>Gómez et al, 2007<br><br>Mann, 2011                                                                                    |
| <b>Dispositivo</b>                  | Aparato que controla                                                                                                                       | Uso de dispositivo cardiaco.                                                                                                                                                                                              | Cualitativa                          | Rosas et al,                                                                                                                                   |

|                                                                                   |                                                                      |  |
|-----------------------------------------------------------------------------------|----------------------------------------------------------------------|--|
|  | <b>PROTOCOLOS DE INVESTIGACIÓN</b><br><br><b>RED CHAGAS COLOMBIA</b> |  |
| Elaborado por:<br>Juan David Ramírez<br>Coordinador CCDM<br>RED CHAGAS COLOMBIA   | Revisado por:<br>Zulma Cucunubá<br>Gerente<br>RED CHAGAS COLOMBIA    |  |

|                                                                       |                                                                                                                           |                                                                                                                                                                                                                        |                                      |                                                                         |
|-----------------------------------------------------------------------|---------------------------------------------------------------------------------------------------------------------------|------------------------------------------------------------------------------------------------------------------------------------------------------------------------------------------------------------------------|--------------------------------------|-------------------------------------------------------------------------|
| <b>electrónico cardiaco</b>                                           | artificialmente el ritmo cardiaco.                                                                                        | Marcapaso<br>Desfibrilador<br>Si – No                                                                                                                                                                                  | Dicotómica<br>Nominal                | 2002<br><br>Mora et al,<br>2007                                         |
| <b>Conocimiento del vector</b>                                        | Identificación de alguno de los vectores (Rhodnius, Triatoma, Panstrongylus) relacionados con la transmisión del T.cruzi. | Conoce o ha visto en algún momento de la vida en su residencia o alrededor de esta algún vector de Chagas.                                                                                                             | Cualitativa<br>Dicotómica<br>Nominal | Rosas et al,<br>2002<br><br>Cucunubá et al,<br>2012                     |
| <b>Tiempo aproximado desde la última exposición al vector (TAUEV)</b> | Tiempo transcurrido desde la última vez que vio al vector relacionado con la enfermedad de Chagas.                        | Determinar a través de la entrevista clínica la edad del paciente cuando vio por última vez a alguno de los vectores para Chagas. Con este dato establecer con referencia a la edad actual el TAUEV expresado en años. | Cuantitativa<br>discreta<br>De razón | Alarcón et al,<br>2010                                                  |
| <b>Característica de la vivienda</b>                                  |                                                                                                                           |                                                                                                                                                                                                                        |                                      |                                                                         |
| <b>Techo</b>                                                          | Parte superior de una construcción, que lo cubre y cierra.                                                                | Características del techo de la vivienda<br>Paja<br>Palma<br>Madera<br>Zinc<br>Teja<br>Fibra prefabricada<br>Otros                                                                                                     | Cualitativa<br>Politómica<br>Nominal | Campbell et al,<br>2007<br><br>Crocco et al,<br>2005                    |
| <b>Paredes</b>                                                        | Obra de albañilería vertical, que cierra o limita un espacio.                                                             | Características de las paredes de la vivienda durante su niñez.<br>Sin paredes<br>Adobe<br>Tapia pisada<br>Tierra<br>Metálica<br>Ladrillo/bloque<br>Madera<br>Otro material                                            | Cualitativa<br>Politómica<br>Nominal | Campbell et al,<br>2007<br><br>Crocco et al,<br>2005<br><br>DANE, 2007* |
| <b>Piso</b>                                                           | Pavimento natural o artificial de las habitaciones, etc.                                                                  | Características del piso de la vivienda<br>Barro<br>Madera<br>Baldosa<br>Cemento<br>Otro material                                                                                                                      | Cualitativa<br>Politómica            | Campbell et al,<br>2007<br><br>Crocco et al,<br>2005<br><br>DANE, 2007* |
| <b>Ocupación</b>                                                      | Trabajo, empleo, oficio.                                                                                                  | Abierta:<br>Hogar<br>Fontanero<br>Madre comunitaria<br>Agricultor                                                                                                                                                      | Cualitativa<br>Politómica<br>Nominal | Rosas et al,<br>2002<br><br>DANE, 2005                                  |

|                                                                                   |                                                                      |  |
|-----------------------------------------------------------------------------------|----------------------------------------------------------------------|--|
|  | <b>PROTOCOLOS DE INVESTIGACIÓN</b><br><br><b>RED CHAGAS COLOMBIA</b> |  |
| Elaborado por:<br>Juan David Ramírez<br>Coordinador CCDM<br>RED CHAGAS COLOMBIA   | Revisado por:<br>Zulma Cucunubá<br>Gerente<br>RED CHAGAS COLOMBIA    |  |

|                                     |                                                                                                                                       |                                                                                                                                                                             |                                      |                                                   |
|-------------------------------------|---------------------------------------------------------------------------------------------------------------------------------------|-----------------------------------------------------------------------------------------------------------------------------------------------------------------------------|--------------------------------------|---------------------------------------------------|
|                                     |                                                                                                                                       | Profesor<br>Estudiante<br>Conductor<br>Promotor de salud<br>Comerciante<br>Desconocida                                                                                      |                                      |                                                   |
| <b>Síntomas</b>                     |                                                                                                                                       |                                                                                                                                                                             |                                      |                                                   |
| <b>Asintomático</b>                 | Sin síntomas relacionados con la enfermedad de Chagas                                                                                 | Paciente que en la entrevista clínica o HC no refiere síntomas como Disnea (clase funcional), palpitaciones, Dolor precordial, constipación y disfagia)<br>Si – No          | Cualitativa<br>Dicotómica<br>Nominal | Rosas et al, 2002                                 |
| <b>Palpitaciones</b>                | Latido del corazón, sensible e incómodo para el enfermo, y más frecuente que el normal.                                               | Referencia de palpitaciones. Durante la entrevista clínica y/o revisión de la HC.<br>Si – No                                                                                | Cualitativa<br>Dicotómica<br>Nominal |                                                   |
| <b>Disnea</b>                       | Dificultad para respirar.                                                                                                             | Referencia de disnea. Durante la entrevista clínica y/o revisión de la HC. Si- No                                                                                           | Cualitativa<br>Dicotómica<br>Nominal |                                                   |
| <b>Dolor precordial</b>             | Malestar y dolor sentido en el centro del tórax, generalmente de tipo opresivo que puede tener irradiación a cuello, cabeza y brazos. | Manifestación de dolor en zona central del tórax.<br>Si-No                                                                                                                  | Cualitativa<br>Dicotómica<br>Nominal |                                                   |
| <b>Clase funcional NYHA clínica</b> | Relación entre la limitación de actividad física y la presencia de síntomas cardíacos.                                                | Relación entre la limitación a la actividad física y palpitaciones, disnea, dolor precordial o fatiga. Clasificar clase funcional (CF).<br>CF I<br>CF II<br>CF III<br>CF IV | Cualitativa<br>Ordinal               | Greenberg B & Kahn AM, 2011                       |
| <b>Pre-síncope</b>                  | Alteración transitoria del nivel de conciencia, sin pérdida completa de ésta.                                                         | Sensación de que van a perder la conciencia de forma inminente pero sin llegar a hacerlo.<br>Si-No                                                                          | Cualitativa<br>Dicotómica<br>Nominal | Rosas et al, 2002<br>Peinado et al, 2004          |
| <b>Síncope</b>                      | Pérdida transitoria de conciencia, con pérdida de tono postural, recuperación espontánea, sin maniobras de reanimación.               | Historia de algún episodio de Síncope.<br>Si – No                                                                                                                           | Cualitativa<br>Dicotómica<br>Nominal | Rosas et al, 2002<br>Peinado, 2004<br>Prata, 2000 |
| <b>Disfagia</b>                     | Dificultad para la deglución.                                                                                                         | Historia de disfagia<br>Si – No                                                                                                                                             | Cualitativa<br>Dicotómica            | Matsuda et al, 2009                               |

|                                                                                                                         |                                                                                                           |  |
|-------------------------------------------------------------------------------------------------------------------------|-----------------------------------------------------------------------------------------------------------|--|
|  <p><b>RED CHAGAS</b><br/>Colombia</p> | <p align="center"><b>PROTOCOLOS DE INVESTIGACIÓN</b></p> <p align="center"><b>RED CHAGAS COLOMBIA</b></p> |  |
| <p>Elaborado por:<br/>Juan David Ramírez<br/>Coordinador CCDM<br/>RED CHAGAS COLOMBIA</p>                               | <p>Revisado por:<br/>Zulma Cucunubá<br/>Gerente<br/>RED CHAGAS COLOMBIA</p>                               |  |

|                                                |                                                                                                                                                            |                                                                                       |                                      |                                                                                           |
|------------------------------------------------|------------------------------------------------------------------------------------------------------------------------------------------------------------|---------------------------------------------------------------------------------------|--------------------------------------|-------------------------------------------------------------------------------------------|
|                                                |                                                                                                                                                            |                                                                                       | Nominal                              |                                                                                           |
| <b>Tiempo con presencia de Disfagia.</b>       | Tiempo durante el cual el paciente viene presentando dificultad para la deglución.                                                                         | Referencia de disfagia expresada en años.                                             | Cuantitativa<br>De razón             | Pérez et al, 2011                                                                         |
| <b>Constipación</b>                            | Retención de materia fecal o dificultad para eliminarla.                                                                                                   | Historia de constipación o estreñimiento.<br>Si – No                                  | Cualitativa<br>Dicotómica<br>Nominal | Rassi A & Rezende JM, 2011                                                                |
| <b>Tiempo con presencia de Constipación.</b>   | Tiempo durante el cual el paciente viene presentando constipación.                                                                                         | Referencia de constipación expresada en años.                                         | Cuantitativa<br>De razón             |                                                                                           |
| <b>Examen físico</b>                           |                                                                                                                                                            |                                                                                       |                                      |                                                                                           |
| <b>Peso</b>                                    | Medida derivada de la fuerza gravitacional sobre el cuerpo humano.                                                                                         | Medición del peso corporal al momento del registro médico.<br>Expresado en kilogramos | Cuantitativa<br>Continua<br>De razón | Variables para establecer cambios del peso como efecto adverso e influencia de IMC en PCR |
| <b>Talla</b>                                   | Estatura o altura de las personas.                                                                                                                         | Medición de la talla al momento del registro médico. Expresado en centímetros.        | Cuantitativa<br>Continua<br>Razón    |                                                                                           |
| <b>Soplo sistólico</b>                         | Ruido anormal por el flujo sanguíneo desigual a través de las válvulas cardíacas.                                                                          | Presencia a la auscultación de soplo cardíaco en sístole.<br>Si – No                  | Cualitativa<br>Dicotómica<br>Nominal | Rosas et al, 2002                                                                         |
| <b>Radiografía de Tórax</b>                    |                                                                                                                                                            |                                                                                       |                                      |                                                                                           |
| <b>Índice Cardiotorácico (ICT)</b>             | Relación que existe entre el diámetro transversal del corazón y el diámetro transversal del tórax, medidos en la proyección PA de la Radiografía de Tórax. | ICT >0.5<br>Si – No                                                                   | Cualitativa<br>Dicotómica<br>Nominal | Rassi A Jr. et al, 2006                                                                   |
| <b>Electrocardiograma</b>                      |                                                                                                                                                            |                                                                                       |                                      |                                                                                           |
| <b>Registro ECG Normal</b>                     | Ausencia de alteraciones en el registro electrocardiográfico                                                                                               | Lectura del ecg normal en el registro médico.<br>Si – No                              | Cualitativa<br>Dicotómica<br>Nominal | Rosas et al, 2002                                                                         |
| <b>Frecuencia cardíaca</b>                     | Numero de despolarizaciones ventriculares en un minuto.                                                                                                    | Frecuencia cardíaca en ritmo sinusal expresada en #latidos/minutos.                   | Cuantitativa<br>Discreta<br>De razón |                                                                                           |
| <b>BCRD (bloqueo completo de rama derecha)</b> | QRS ≥ 120 mseg<br>rsr', RSR', o 'rSR, en V1 y V2<br>S en DI y V6 ≥40 ms<br>R > 50 ms en V1                                                                 | Registro de ecg con morfología de BCRD. Si – No                                       | Cualitativa<br>Dicotómica<br>Nominal |                                                                                           |
| <b>Bloqueo fascicular anterior</b>             | Eje QRS = -45 a -90 grados, en plano frontal.                                                                                                              | Lectura de ecg con BFAI<br>Si – No                                                    | Cualitativa<br>Dicotómica<br>Nominal |                                                                                           |



|                                                                                                                         |                                                                             |  |
|-------------------------------------------------------------------------------------------------------------------------|-----------------------------------------------------------------------------|--|
|  <p><b>RED CHAGAS</b><br/>Colombia</p> | <p><b>PROTOCOLOS DE INVESTIGACIÓN</b></p> <p><b>RED CHAGAS COLOMBIA</b></p> |  |
| <p>Elaborado por:<br/>Juan David Ramírez<br/>Coordinador CCDM<br/>RED CHAGAS COLOMBIA</p>                               | <p>Revisado por:<br/>Zulma Cucunubá<br/>Gerente<br/>RED CHAGAS COLOMBIA</p> |  |

|                                                  |                                                                                                                                                                                                                                                                                                             |                                                                             |                                |                                                                                  |
|--------------------------------------------------|-------------------------------------------------------------------------------------------------------------------------------------------------------------------------------------------------------------------------------------------------------------------------------------------------------------|-----------------------------------------------------------------------------|--------------------------------|----------------------------------------------------------------------------------|
| <b>izquierdo (BFAI)</b>                          | qR en aVL<br>QRS <120 ms<br>R en aVL ≥ 45 mseg                                                                                                                                                                                                                                                              |                                                                             |                                | Salles et al, 2003                                                               |
| <b>Trastornos inespecífico de repolarización</b> | Depresión leve ST o inversión de la onda T o T aplanada sin causa evidente.                                                                                                                                                                                                                                 | Lectura de ecg con Trastorno inespecificos de la repolarización.<br>Si – No | Cualitativa Dicotómica Nominal | Olgin J & Zipes DP, 2011                                                         |
| <b>QTd-ECG</b>                                   | QT(máx.)-QT(min)                                                                                                                                                                                                                                                                                            | < 65ms<br>Si – No                                                           | Cualitativa Dicotómica Nominal | Mirvis DM & Goldberger AL, 2011                                                  |
| <b>Bloqueo Bifascicular</b>                      | Bloqueo de 2 fascículos<br>1. BCRD + LAFB (patrón BCRD + eje >-45 grados.)<br>2. BCRD + LPFB (patrón BCRD + eje 120 grados.)<br>3. BRI<br>QRS ≥ 120 mseg<br>R muescas en I, aVL, V5 y V6<br>r pequeña/ausente + S profunda en V1 y V2.<br>ausencia de ondas Q septales I, V5 y V6<br>R (> 60 ms) en V5 y V6 | ECG con bloqueo bifascicular<br>Grupo 1<br>Grupo 2<br>Grupo 3               | Cualitativa Politómica Nominal | Rassi A Jr. et al, 2006<br><br>Isselbacher et al, 2010<br><br>Garzón et al, 1995 |
| <b>Bloqueos AV</b>                               | Bloqueo variable de la conducción auriculo-ventricular                                                                                                                                                                                                                                                      | Grado 1<br>Grado 2<br>Grado 3                                               | Cualitativa Politómica Nominal |                                                                                  |
| <b>Extrasístoles ventriculares</b>               | Despolarización ectópica ventricular con uno o múltiples focos.                                                                                                                                                                                                                                             | Pueden ser<br>- Sin extrasístoles<br>- Monomórfica<br>- Polimórfica         | Cualitativa Politómica Nominal |                                                                                  |
| <b>Bajo voltaje QRS</b>                          | Amplitud total del QRS en cada una de las derivaciones: DI-DIII y AvR-AvL-AvF es =<0,5 mV o de V1-V6 =<1,0 mV.                                                                                                                                                                                              | Bajo voltaje en ECG.<br>Si – No                                             | Cualitativa Dicotómica Nominal |                                                                                  |
| <b>Fibrilación Auricular</b>                     | Arritmia supraventricular con oscilaciones de baja amplitud de línea de base (fibrilación o las ondas f) y un ritmo ventricular irregular.                                                                                                                                                                  | Ecg con FA<br>Si – No                                                       | Cualitativa Dicotómica Nominal |                                                                                  |
| <b>Zonas de inactividad</b>                      | Zonas que no produce fuerza eléctricas (no                                                                                                                                                                                                                                                                  | Lectura de ECG con ZIE                                                      | Cualitativa Dicotómica         |                                                                                  |

|                                                                                                                         |                                                                                                           |  |
|-------------------------------------------------------------------------------------------------------------------------|-----------------------------------------------------------------------------------------------------------|--|
|  <p><b>RED CHAGAS</b><br/>Colombia</p> | <p align="center"><b>PROTOCOLOS DE INVESTIGACIÓN</b></p> <p align="center"><b>RED CHAGAS COLOMBIA</b></p> |  |
| <p>Elaborado por:<br/>Juan David Ramírez<br/>Coordinador CCDM<br/>RED CHAGAS COLOMBIA</p>                               | <p>Revisado por:<br/>Zulma Cucunubá<br/>Gerente<br/>RED CHAGAS COLOMBIA</p>                               |  |

|                                                     |                                                                                                                                                                                                                                                                                                                |                                                                             |                                      |                                                                                  |
|-----------------------------------------------------|----------------------------------------------------------------------------------------------------------------------------------------------------------------------------------------------------------------------------------------------------------------------------------------------------------------|-----------------------------------------------------------------------------|--------------------------------------|----------------------------------------------------------------------------------|
| <b>eléctrica (ZIE)</b>                              | despolariza ni repolariza), se expresa como Onda Q.                                                                                                                                                                                                                                                            |                                                                             | Nominal                              |                                                                                  |
| <b>Holter</b>                                       |                                                                                                                                                                                                                                                                                                                |                                                                             |                                      |                                                                                  |
| <b>Taquicardia ventricular no sostenida</b>         | Presencia de 3 o + latidos consecutivos originados en tejido ventricular con una frecuencia promedio de 100 latidos por minuto durante no más de 30 segundos.                                                                                                                                                  | Presencia de TVNS en Holter<br>Si - No                                      | Cualitativa<br>Dicotómica<br>Nominal | Rassi A Jr. et al, 2006<br><br>Grupi et al, 1995                                 |
| <b>Registro Holter Normal</b>                       | Ausencia de alteraciones en el registro Holter                                                                                                                                                                                                                                                                 | Lectura del Holter normal en el registro medico.<br>Si - No                 | Cualitativa<br>Dicotómica<br>Nominal |                                                                                  |
| <b>BCRD (bloqueo completo de rama derecha)</b>      | QRS $\geq$ 120 mseg<br>rsr', RSR', o rSR, en V1 y V2<br>S en DI y V6 $\geq$ 40 ms<br>R > 50 ms en V1                                                                                                                                                                                                           | Registro del Holter con morfología de BCRD.<br>Si - No                      | Cualitativa<br>Dicotómica<br>Nominal |                                                                                  |
| <b>Bloqueo fascicular anterior izquierdo (BFAI)</b> | Eje QRS = -45 a -90 grados, en plano frontal.<br>qR en aVL<br>QRS < 120 ms<br>R en aVL $\geq$ 45 mseg                                                                                                                                                                                                          | Lectura del Holter con BFAI<br>Si - No                                      | Cualitativa<br>Dicotómica<br>Nominal | Rosas et al, 2002<br><br>Salles et al, 2003                                      |
| <b>Trastornos inespecífico de repolarización</b>    | Depresión leve ST o inversión de la onda T o T aplanamiento de la onda sin causa evidente.                                                                                                                                                                                                                     | Lectura de ecg con Trastorno inespecíficos de la repolarización.<br>Si - No | Cualitativa<br>Dicotómica<br>Nominal | Olgin J & Zipes DP, 2011                                                         |
| <b>QTd - Holter</b>                                 | QT (máx.)-QT(min)                                                                                                                                                                                                                                                                                              | < 65ms<br>Si - No                                                           | Cualitativa<br>Dicotómica<br>Nominal | Mirvis DM & Goldberger AL, 2011                                                  |
| <b>Bloqueo Bisfascicular</b>                        | Bloqueo de 2 fascículos<br>1. BCRD + LAFB (patrón BCRD + eje > -45 grados.)<br>2. BCRD + LPFB (patrón BCRD + eje 120 grados.)<br>3. BRI<br>QRS $\geq$ 120 mseg<br>R muescas en I, aVL, V5 y V6<br>r pequeña/ausente + S profunda en V1 y V2.<br>ausencia de ondas Q septales I, V5 y V6<br>R (> 60 ms) en V5 y | ECG con bloqueo bifascicular<br>Grupo 1<br>Grupo 2<br>Grupo 3               | Cualitativa<br>Politómica<br>Nominal | Rassi A Jr. et al, 2006<br><br>Isselbacher et al, 2010<br><br>Garzón et al, 1995 |

|                                                                                   |                                                                      |  |
|-----------------------------------------------------------------------------------|----------------------------------------------------------------------|--|
|  | <b>PROTOCOLOS DE INVESTIGACIÓN</b><br><br><b>RED CHAGAS COLOMBIA</b> |  |
| Elaborado por:<br>Juan David Ramírez<br>Coordinador CCDM<br>RED CHAGAS COLOMBIA   | Revisado por:<br>Zulma Cucunubá<br>Gerente<br>RED CHAGAS COLOMBIA    |  |

|                                                                |                                                                                                                                            |                                                                              |                                      |                                               |
|----------------------------------------------------------------|--------------------------------------------------------------------------------------------------------------------------------------------|------------------------------------------------------------------------------|--------------------------------------|-----------------------------------------------|
|                                                                | V6                                                                                                                                         |                                                                              |                                      |                                               |
| <b>Bloqueos AV</b>                                             | Bloqueo variable de la conducción auriculo-ventricular                                                                                     | Grado 1<br>Grado 2<br>Grado 3                                                | Cualitativa<br>Politómica<br>Nominal |                                               |
| <b>Extrasístoles ventriculares monomórfica</b>                 | Despolarización de un foco ectópico ventricular.                                                                                           | Numero de extrasístoles monomórficas registradas durante el registro Holter. | Cuantitativa<br>De razón             |                                               |
| <b>Extrasístoles ventriculares polimórficas (multifocales)</b> | Despolarización ectópica ventricular con uno o múltiples focos.                                                                            | Numero de extrasístoles registradas durante el registro Holter               | Cuantitativa<br>De razón             |                                               |
| <b>Fibrilación Auricular</b>                                   | Arritmia supraventricular con oscilaciones de baja amplitud de línea de base (fibrilación o las ondas f) y un ritmo ventricular irregular. | Holter con FA sostenida o FA paroxísticas<br>Si - No                         | Cualitativa<br>Dicotómica<br>Nominal |                                               |
| <b>Ecocardiograma (ECG)</b>                                    |                                                                                                                                            |                                                                              |                                      |                                               |
| <b>Aneurisma apical de VI (ventrículo izquierdo)</b>           | Dilatación localizada en pared de VI.                                                                                                      | Visualización en eco de aneurisma apical VI.<br>Si - No                      | Cualitativa<br>Dicotómica<br>Nominal |                                               |
| <b>Trombo intracavitario</b>                                   | Coagulo de sangre en VI                                                                                                                    | Visualización en eco de trombo intracavitario.<br>Si - No                    | Cualitativa<br>Dicotómica<br>Nominal |                                               |
| <b>Incremento Diámetro VI al final de la diástole</b>          | Aumento diámetro VI al final de la diástole.                                                                                               | Si - No                                                                      | Cualitativa<br>Dicotómica<br>Nominal | Rassi A Jr. et al, 2006                       |
| <b>Incremento diámetro VI sístole</b>                          | Aumento diámetro VI durante la contracción.                                                                                                | Si - No                                                                      | Cualitativa<br>Dicotómica<br>Nominal | Rassi A Jr. et al, 2007                       |
| <b>Fracción de eyección VI</b>                                 | Proporción de sangre expulsada en cada contracción ventricular.                                                                            | Expresado en %                                                               | Cuantitativa<br>Continua<br>De razón | Viotti et al, 2004                            |
| <b>Anormalidad segmentaria o global de la movilidad de VI</b>  | Alteración en la movilidad de la pared ventricular.                                                                                        | Si - No                                                                      | Cualitativa<br>Dicotómica<br>Nominal | Isselbacher et al, 2010<br>Chaves et al, 2006 |
| <b>Aumento velocidad onda A mitral</b>                         | Incremento de la velocidad de la onda A mitral. Con consiguiente                                                                           | Si - No                                                                      | Cualitativa<br>Dicotómica<br>Nominal | Acquatela et al, 2007                         |
| <b>Disminución del índice E/A</b>                              | disminución del índice E/A.                                                                                                                | Si - No                                                                      | Cualitativa<br>Dicotómica<br>Nominal |                                               |
| <b>Aumento del tiempo relajación Isovolumétrica</b>            | Prolongación del tiempo de relajación del VI.                                                                                              | Si - No                                                                      | Cualitativa<br>Dicotómica<br>Nominal |                                               |

|                                                                                   |                                                                      |  |
|-----------------------------------------------------------------------------------|----------------------------------------------------------------------|--|
|  | <b>PROTOCOLOS DE INVESTIGACIÓN</b><br><br><b>RED CHAGAS COLOMBIA</b> |  |
| Elaborado por:<br>Juan David Ramírez<br>Coordinador CCDM<br>RED CHAGAS COLOMBIA   | Revisado por:<br>Zulma Cucunubá<br>Gerente<br>RED CHAGAS COLOMBIA    |  |

|                                        |                                                                                                                                                                                                                                    |                                                                                               |                                |                                    |
|----------------------------------------|------------------------------------------------------------------------------------------------------------------------------------------------------------------------------------------------------------------------------------|-----------------------------------------------------------------------------------------------|--------------------------------|------------------------------------|
| <b>VI</b>                              |                                                                                                                                                                                                                                    |                                                                                               |                                |                                    |
| <b>Alteración valvular mitral</b>      | Incompetencia valvular mitral durante su cierre o apertura.                                                                                                                                                                        | Si - No                                                                                       | Cualitativa Dicotómica Nominal |                                    |
| <b>Clasificación Miocardiopatía</b>    |                                                                                                                                                                                                                                    |                                                                                               |                                |                                    |
| <b>Clasificación AHA</b>               | Clasificaciones que establecen la relación entre la presencia o ausencia de síntomas cardiacos y los hallazgos de normalidad o anomalía en el Electrocardiograma, Ecocardiograma o la radiografía de tórax.                        | Clasificación según AHA de acuerdo a lo registrado en la HC.<br>A, B, C, D                    | Cualitativa Ordinal            | Hunt et al, 2005                   |
| <b>Clasificación Consenso. Brasil.</b> |                                                                                                                                                                                                                                    | Clasificación según Cons. Brasil de acuerdo a lo registrado en la HC.<br>A, B1, B2, C, D.     | Cualitativa Ordinal            | Gómez et al, 2007                  |
| <b>Clasificación Andes Modificada.</b> |                                                                                                                                                                                                                                    | Clasificación según Andes modificada de acuerdo a lo registrado en la HC.<br>IA, IB, II, III. | Cualitativa Ordinal            | Andrade et al, 2011                |
| <b>Clasificación Kuschnir</b>          |                                                                                                                                                                                                                                    | Clasificación según Kuschnir modificada de acuerdo a lo registrado en la HC.<br>0, I, II, III | Cualitativa Ordinal            | Ministerio da Saude, 2005          |
| <b>Laboratorio</b>                     |                                                                                                                                                                                                                                    |                                                                                               |                                |                                    |
| <b>IFI positividad</b>                 | Presencia de anticuerpos IgG anti- <i>T. cruzi</i> en suero, detectados mediante fluorescencia                                                                                                                                     | Reactivo/No reactivo                                                                          | Cualitativa Dicotómica Nominal | Storch W ,2000                     |
| <b>IFI títulos</b>                     | Contenido de anticuerpos IgG anti- <i>T. cruzi</i> en diluciones seriadas del suero que se unen a una cantidad estándar de antígeno y determinan el nivel en el cual se produce la reacción positiva, detectada por fluorescencia. | 1/8, 1/16, 1/32, 1/64, 1/128, 1/256, 1/512, 1/1024, 1/2048                                    | Cualitativa Ordinal            | Roitt, 2008                        |
| <b>ELISA Positividad</b>               | Presencia de anticuerpos IgG anti- <i>T. cruzi</i> en suero unidos al antígeno, detectados mediante espectrofotometría.                                                                                                            | Positivo/Negativo                                                                             | Cualitativa Dicotómica Nominal | Crowther, 1995<br>Venkatesan, 1993 |
| <b>ELISA Absorbancia</b>               | Medida espectrofotométrica de anticuerpos IgG-anti <i>T. cruzi</i> en función de su afinidad y concentración.                                                                                                                      | 0.0-2.5                                                                                       | Cuantitativa Intervalo         | Venkatesan P and Wakelin D, 1993   |
| <b>HAI Positividad</b>                 | Presencia de anticuerpos IgG anti- <i>T. cruzi</i> en suero,                                                                                                                                                                       | Reactivo/No reactivo                                                                          | Cualitativa Dicotómica Nominal | Gilbert, 1992                      |

|                                                                                   |                                                                      |  |
|-----------------------------------------------------------------------------------|----------------------------------------------------------------------|--|
|  | <b>PROTOCOLOS DE INVESTIGACIÓN</b><br><br><b>RED CHAGAS COLOMBIA</b> |  |
| Elaborado por:<br>Juan David Ramírez<br>Coordinador CCDM<br>RED CHAGAS COLOMBIA   | Revisado por:<br>Zulma Cucunubá<br>Gerente<br>RED CHAGAS COLOMBIA    |  |

|                                            |                                                                                                                                                                                                                       |                                                       |                                      |                                                                                            |
|--------------------------------------------|-----------------------------------------------------------------------------------------------------------------------------------------------------------------------------------------------------------------------|-------------------------------------------------------|--------------------------------------|--------------------------------------------------------------------------------------------|
|                                            | detectados mediante aglutinación.                                                                                                                                                                                     |                                                       |                                      |                                                                                            |
| <b>TESAblot</b>                            | Presencia de anticuerpos IgG anti- <i>T. cruzi</i> en suero, detectados por Westernblot utilizando TESA (antígenos de secreción y excreción obtenidos mediante cultivo de formas tripomastigotes de <i>T. cruzi</i> ) | Positivo/ Negativo                                    | Cualitativa<br>Dicotómica<br>Nominal | Umezawa, 1996<br>Ramírez et al., 2009<br>Nakazawa et al., 2001                             |
| <b>PCR Positividad</b>                     | Detección de ADN de <i>T. cruzi</i> en sangre mediante amplificación enzimática de ADN diana.                                                                                                                         | Positivo/Negativo                                     | Cualitativa<br>Dicotómica<br>Nominal | Higuchi R, 1993<br>Basquiera et al., en 2003<br>Hidron et al, 2010<br>Ramírez et al., 2009 |
| <b>PCR Carga parasitaria</b>               | Medición de la concentración inicial del ADN diana en muestras de sangre, equivalente al número de parásitos por mL.                                                                                                  | 0.0 - 1 x 10 <sup>5</sup>                             | Cuantitativa<br>Razón                | Higuchi R, 1993<br>Moreira et al., 2013                                                    |
| <b>Genotipificación de <i>T. cruzi</i></b> | Determinación del contenido genómico para clasificación de <i>T. cruzi</i> en Unidades de Tipificación Discretas en ADN de <i>T. cruzi</i> .                                                                          | DTU's:<br>TcI<br>TcII<br>TcIII<br>TcIV<br>TcV<br>TcVI | Cualitativa<br>Politómica<br>Nominal | Zingales et al., 2010 y 2012<br>Ramírez et al., 2010                                       |

### Tipo de estudio y diseño general Objetivo 1

Estudio observacional de cohorte retrospectiva. Para este objetivo, se analizarán las variables de línea de base, definida como el momento de inicio del tratamiento.

### Universo de estudio, selección y tamaño de muestra, unidad de análisis y observación.

El tamaño de la muestra que será utilizado en este estudio estará conformado aproximadamente por 785 pacientes quienes han recibido terapia tripanocida en el Instituto Nacional de Salud, Instituto Colombiano de Medicina

|                                                                                   |                                                                      |  |
|-----------------------------------------------------------------------------------|----------------------------------------------------------------------|--|
|  | <b>PROTOCOLOS DE INVESTIGACIÓN</b><br><br><b>RED CHAGAS COLOMBIA</b> |  |
| Elaborado por:<br>Juan David Ramírez<br>Coordinador CCDM<br>RED CHAGAS COLOMBIA   | Revisado por:<br>Zulma Cucunubá<br>Gerente<br>RED CHAGAS COLOMBIA    |  |

Tropical, Secretaría de Salud de Boyacá y Secretaría de Salud de Casanare. De acuerdo a las bases de datos, cada una de estas instituciones aglomera un número aproximado de 400, 20, 120 y 125 pacientes respectivamente.

### **Criterios de inclusión y exclusión Objetivo 1**

Se incluirán los pacientes que iniciaron el manejo etiológico por enfermedad de Chagas entre los años 2000 y 2012 en las siguientes instituciones; Instituto Nacional de Salud, Instituto Colombiano de Medicina Tropical, Secretaría de Salud de Boyacá y Secretaría de Salud de Casanare.

Se excluirán los pacientes con diagnóstico de enfermedad de Chagas fase aguda y los menores de 18 años de edad.

### **Procedimientos para la recolección de información, instrumentos a utilizar y métodos para el control y calidad de los datos Objetivo 1**

En coordinación con el Centro Coordinador de Datos y Muestras (CCDM) se diseñara el formato de historia clínica sistematizada, para su validación se realizarán pruebas piloto con algunos pacientes, buscando ajustar términos y variables. Una vez validada, la historia clínica sistematizada será el documento de referencia para el manejo de la información de cada paciente.

Con respecto al proceso de recolección de la información, esta será digitada utilizando la historia clínica sistematizada, de esta, se extraerán los datos necesarios para la descripción y análisis de las variables. Se realizarán entrenamientos sucesivos a los investigadores en la aplicación de los formatos de recolección de la información y se realizarán pilotos para el ajuste y resolución de dudas específicas en las variables del documento. Se harán dos evaluaciones de la calidad de la información registrada en los formatos, por medio de verificación de una muestra aleatoria del total de los formatos registrados, correspondiente al 5% de las mismas. Errores superiores al 20% del total de variables registradas obligarán a la revisión del total de la información.

### **Dificultades y limitaciones del estudio Objetivo 1**

Dada la naturaleza retrospectiva de esta fase del análisis, la principal limitación de esta fase del estudio se relaciona con valores perdidos. El manejo de estas pérdidas de información se explica durante el plan de análisis.

### **Plan de análisis de los resultados Objetivo 1**

Una vez exportada la base y evaluada la calidad de los datos, se realizará un análisis exploratorio de la información. Se obtendrán histogramas y box-plot para las variables continuas y gráficos de barras para variables categóricas. Se evaluarán las pérdidas de información

|                                                                                   |                                                                      |  |
|-----------------------------------------------------------------------------------|----------------------------------------------------------------------|--|
|  | <b>PROTOCOLOS DE INVESTIGACIÓN</b><br><br><b>RED CHAGAS COLOMBIA</b> |  |
| Elaborado por:<br>Juan David Ramírez<br>Coordinador CCDM<br>RED CHAGAS COLOMBIA   | Revisado por:<br>Zulma Cucunubá<br>Gerente<br>RED CHAGAS COLOMBIA    |  |

para cada variable, según si son informativas o sugieren sesgo. Pérdidas de información superiores a 20% en la variable implicará su exclusión del análisis y evaluación de sesgo de información. En pérdidas inferiores al 20% se evaluará la probabilidad de sesgo de información y en caso de ameritarlo serán tratadas con estrategias de imputación y análisis de sensibilidad para las mismas. Para cada medida de asociación se estimarán los intervalos de confianza al 95%. Se empleará el software Stata 10.0 (StataCorp. 2007. *Stata Statistical Software: Release 10*. College Station, TX: StataCorp LP.)

### **Métodos y modelos de análisis de los datos según tipo de variables Objetivo 1**

Las variables continuas serán descritas como medias con desviación estándar, mediana y rango intercuartílico y las variables categóricas como porcentajes.

### **METODOLOGÍA OBJETIVO ESPECÍFICO 2:**

*Objetivo 2: Describir la seguridad y tolerabilidad del medicamento (Benzonidazol ó Nifurtimox), determinada por la frecuencia y distribución de los efectos adversos relacionados.*

### **Definición operacional de las variables objetivo 2**

La clasificación por sistemas se hizo de acuerdo al sistema de terminología de efectos adversos de la organización mundial de la salud WHO-ART CLASS (Terminology for coding clinical information in relation to drug therapy) (WHO-ART, 2005).

| <b>Variable</b>                   | <b>Definición conceptual</b>                                        | <b>Definición operacional</b>                       | <b>Tipo de variable y escala de medición</b> | <b>Referencia</b> |
|-----------------------------------|---------------------------------------------------------------------|-----------------------------------------------------|----------------------------------------------|-------------------|
| <b>Tratamiento etiológico</b>     | Medicamento que se emplea para tratar la enfermedad de Chagas       | Clasificar en Benzonidazol o en Nifurtimox          | Cualitativa nominal dicotómica               | MPS, 2010         |
| <b>Dosis</b>                      | Cantidad de Benzonidazol o Nifurtimox suministrado en mg/Kg/día.    | Dosis de Nifurtimox o Benzonidazol                  | Cuantitativa continua de razón               | MPS, 2011         |
| <b>Número de tabletas tomadas</b> | Cantidad de tabletas de Nifurtimox o Benzonidazol ingeridas al día. | Conteo de tabletas ingeridas.                       | Cuantitativa discreta de razón               | MPS, 2011         |
| <b>Duración del Tratamiento</b>   | Tiempo que el paciente ingiere Nifurtimox o Benzonidazol            | Días que el paciente tomó Nifurtimox o Benzonidazol | Cuantitativa discreta de razón               | MPS, 2012         |

|                                                                                                                         |                                                                                                           |  |
|-------------------------------------------------------------------------------------------------------------------------|-----------------------------------------------------------------------------------------------------------|--|
|  <p><b>RED CHAGAS</b><br/>Colombia</p> | <p align="center"><b>PROTOCOLOS DE INVESTIGACIÓN</b></p> <p align="center"><b>RED CHAGAS COLOMBIA</b></p> |  |
| <p>Elaborado por:<br/>Juan David Ramírez<br/>Coordinador CCDM<br/>RED CHAGAS COLOMBIA</p>                               | <p>Revisado por:<br/>Zulma Cucunubá<br/>Gerente<br/>RED CHAGAS COLOMBIA</p>                               |  |

|                                                    |                                                                                                                                                       |                                                             |                                |                      |
|----------------------------------------------------|-------------------------------------------------------------------------------------------------------------------------------------------------------|-------------------------------------------------------------|--------------------------------|----------------------|
| <b>Suspensión temporal del tratamiento</b>         | Interrupción por un tiempo definido del uso de Benzonidazol o Nifurtimox                                                                              | Clasificar en Suspensión temporal del tratamiento o no.     | Cualitativa nominal dicotómica | Coelho et al., 1999  |
| <b>Días de suspensión temporal del tratamiento</b> | Número de días que el paciente no ingirió Nifurtimox o Benzonidazol debido a una suspensión temporal del tratamiento.                                 | Conteo de días                                              | Cuantitativa discreta de razón | Coelho et al., 1999  |
| <b>Suspensión definitiva del tratamiento</b>       | Interrupción definitiva del uso de Benzonidazol o Nifurtimox                                                                                          | Clasificar en Suspensión definitiva del tratamiento o no.   | Cualitativa nominal dicotómica | Coelho et al., 1999  |
| <b>Número de Hospitalizaciones</b>                 | Cantidad de veces que tuvo que ser atendido en un hospital durante el tratamiento etiológico Nifurtimox o Benzonidazol por una reacción adversa.      | Conteo de hospitalizaciones                                 | Cuantitativa discreta de razón | Coelho et al., 1999  |
| <b>Trastornos de piel y anexos</b>                 |                                                                                                                                                       |                                                             |                                |                      |
| <b>Eritema</b>                                     | Inflamación superficial de la piel, caracterizada por manchas rojas.                                                                                  | Clasificar en presencia o en ausencia de eritema            | Cualitativa nominal dicotómica | Pinazo et al., 2010  |
| <b>Eritema multiforme</b>                          | Tipo de reacción de hipersensibilidad con inflamación superficial de la piel, generalizada que se caracteriza por muchas manchas rojas que confluyen. | Clasificar en presencia o en ausencia de eritema multiforme | Cualitativa nominal dicotómica | Pinazo et al., 2010  |
| <b>Eczema</b>                                      | Erupción cutánea con eritema, edema, vesículas, costras, escamas.                                                                                     | Clasificar en presencia o en ausencia de eczema             | Cualitativa nominal dicotómica | Altcheh et al., 2011 |
| <b>Prurito</b>                                     | Picazón o irritación en la piel que despierta la necesidad de rascarse esa área                                                                       | Clasificar en presencia o en ausencia de prurito            | Cualitativa nominal dicotómica | Pinazo et al., 2010  |
| <b>Síndrome Stevens Johnson.</b>                   | .Es una variante severa del eritema multiforme, consistente en una reacción de hipersensibilización que afecta la piel y las membranas mucosa         | Clasificar en presencia o en ausencia de Stevens Johnson.   | Cualitativa nominal dicotómica | Yun et al., 2009     |



|                                                                                   |                                                                      |  |
|-----------------------------------------------------------------------------------|----------------------------------------------------------------------|--|
|  | <b>PROTOCOLOS DE INVESTIGACIÓN</b><br><br><b>RED CHAGAS COLOMBIA</b> |  |
| Elaborado por:<br>Juan David Ramírez<br>Coordinador CCDM<br>RED CHAGAS COLOMBIA   | Revisado por:<br>Zulma Cucunubá<br>Gerente<br>RED CHAGAS COLOMBIA    |  |

|                                                             |                                                                                                                                                                                                                                                                                               |                                                                |                                |                       |
|-------------------------------------------------------------|-----------------------------------------------------------------------------------------------------------------------------------------------------------------------------------------------------------------------------------------------------------------------------------------------|----------------------------------------------------------------|--------------------------------|-----------------------|
| <b>Urticaria</b>                                            | Erupción de la piel caracterizada por lesiones cutáneas edematosas, de contornos delimitados y con un halo eritematoso                                                                                                                                                                        | Clasificar en presencia o en ausencia de urticaria             | Cualitativa nominal dicotómica | Pinazo et al., 2010   |
| <b>Trastornos del sistema músculo-esquelético.</b>          |                                                                                                                                                                                                                                                                                               |                                                                |                                |                       |
| <b>Artralgia</b>                                            | Dolor de las articulaciones.                                                                                                                                                                                                                                                                  | Clasificar en presencia o en ausencia de artralgia             | Cualitativa nominal dicotómica | Pinazo et al., 2010   |
| <b>Calambres</b>                                            | contracciones o espasmos súbitos, involuntarios en uno o más músculos                                                                                                                                                                                                                         | Clasificar en presencia o en ausencia de artralgia             | Cualitativa nominal dicotómica | Altcheh et al., 2011  |
| <b>Mialgia</b>                                              | Dolor muscular                                                                                                                                                                                                                                                                                | Clasificar en presencia o en ausencia de mialgia               | Cualitativa nominal dicotómica | Pinazo et al., 2010   |
| <b>Trastornos del sistema nervioso central y periférico</b> |                                                                                                                                                                                                                                                                                               |                                                                |                                |                       |
| <b>Mareos</b>                                               | Sensación de que se podría desmayar.                                                                                                                                                                                                                                                          | Clasificar en presencia o en ausencia de mareos                | Cualitativa nominal dicotómica | Altcheh et al., 2011  |
| <b>Pérdida temporal de la memoria</b>                       | Olvido inusual que dificulta recordar hechos nuevos.                                                                                                                                                                                                                                          | Clasificar en presencia o en ausencia de pérdida de la memoria | Cualitativa nominal dicotómica | Valencia et al., 2012 |
| <b>Neuropatía periférica</b>                                | Daño del sistema nervioso periférico. Aparece como una sensación de hormigueo, quemazón, endurecimiento o adormecimiento de los pies, incluyendo los dedos. También puede producir una sensación de cosquilleo, dolor sin motivo o sensaciones que parecen ser más intensas que las normales. | Clasificar en presencia o en ausencia de Neuropatía periférica | Cualitativa nominal dicotómica | Coura et al., 1997    |
| <b>Somnolencia</b>                                          | Sentirse anormalmente soñoliento durante el día.                                                                                                                                                                                                                                              | Clasificar en presencia o en ausencia de somnolencia           | Cualitativa nominal dicotómica | Coura et al., 1997    |

|                                                                                   |                                                                      |  |
|-----------------------------------------------------------------------------------|----------------------------------------------------------------------|--|
|  | <b>PROTOCOLOS DE INVESTIGACIÓN</b><br><br><b>RED CHAGAS COLOMBIA</b> |  |
| Elaborado por:<br>Juan David Ramírez<br>Coordinador CCDM<br>RED CHAGAS COLOMBIA   | Revisado por:<br>Zulma Cucunubá<br>Gerente<br>RED CHAGAS COLOMBIA    |  |

|                                               |                                                                                                                                                                |                                                               |                                |                        |
|-----------------------------------------------|----------------------------------------------------------------------------------------------------------------------------------------------------------------|---------------------------------------------------------------|--------------------------------|------------------------|
| <b>Dolor de cabeza</b>                        | Cefalalgia intermitente, que afecta ordinariamente a uno de los lados de la cabeza                                                                             | Clasificar en presencia o en ausencia de dolor de cabeza      | Cualitativa nominal dicotómica | Pinazo et al., 2010    |
| <b>Parestesia</b>                             | Sensación o conjunto de sensaciones anormales como el hormigueo, adormecimiento o ardor                                                                        | Clasificar en presencia o en ausencia de parestesia           | Cualitativa nominal dicotómica | Pinazo et al., 2010    |
| <b>Trastornos de la visión</b>                |                                                                                                                                                                |                                                               |                                |                        |
| <b>Visión borrosa</b>                         | Pérdida de la agudeza visual y la incapacidad para visualizar pequeños detalles                                                                                | Clasificar en presencia o en ausencia de visión borrosa       | Cualitativa nominal dicotómica | Altcheh et al., 2011   |
| <b>Audición y los trastornos vestibulares</b> |                                                                                                                                                                |                                                               |                                |                        |
| <b>Vértigo</b>                                | Sensación de movimiento o giros. Los pacientes sienten como si realmente estuvieran girando o moviéndose, o como si el mundo estuviera girando a su alrededor. | Clasificar en presencia o en ausencia de vértigo              | Cualitativa nominal dicotómica | Carrilero et al., 2011 |
| <b>Tinnitus</b>                               | Acúfenos o zumbidos del oído.                                                                                                                                  | Clasificar en presencia o en ausencia de tinnitus.            | Cualitativa nominal dicotómica | Valencia et al., 2012  |
| <b>Trastornos psiquiátricos</b>               |                                                                                                                                                                |                                                               |                                |                        |
| <b>Insomnio</b>                               | Trastorno del sueño en el cual los pacientes tienen dificultades para quedarse dormidas, para continuar durmiendo o para hacer ambas cosas                     | Clasificar en presencia o en ausencia de insomnio             | Cualitativa nominal dicotómica | Carrilero et al., 2011 |
| <b>Irritabilidad</b>                          | Estado de ánimo o rasgo de personalidad caracterizado por reacciones afectivas exageradas, de ira o de malhumor                                                | Clasificar en presencia o en ausencia de irritabilidad        | Cualitativa nominal dicotómica | Guhl et al., 2001      |
| <b>Trastornos sistema gastrointestinal</b>    |                                                                                                                                                                |                                                               |                                |                        |
| <b>Distensión abdominal</b>                   | Es una afección en la que el abdomen (vientre) se siente lleno y apretado.                                                                                     | Clasificar en presencia o en ausencia de distensión abdominal | Cualitativa nominal dicotómica | Pinazo et al., 2010    |
| <b>Diarrea</b>                                | Síntoma o fenómeno morboso que consiste en evacuaciones de vientre líquidas y frecuentes.                                                                      | Clasificar en presencia o en ausencia de diarrea              | Cualitativa nominal dicotómica | Pinazo et al., 2010    |

|                                                                                                                         |                                                                                                           |  |
|-------------------------------------------------------------------------------------------------------------------------|-----------------------------------------------------------------------------------------------------------|--|
|  <p><b>RED CHAGAS</b><br/>Colombia</p> | <p align="center"><b>PROTOCOLOS DE INVESTIGACIÓN</b></p> <p align="center"><b>RED CHAGAS COLOMBIA</b></p> |  |
| <p>Elaborado por:<br/>Juan David Ramírez<br/>Coordinador CCDM<br/>RED CHAGAS COLOMBIA</p>                               | <p>Revisado por:<br/>Zulma Cucunubá<br/>Gerente<br/>RED CHAGAS COLOMBIA</p>                               |  |

|                                                   |                                                                                 |                                                                                                                                                                             |                                |                        |
|---------------------------------------------------|---------------------------------------------------------------------------------|-----------------------------------------------------------------------------------------------------------------------------------------------------------------------------|--------------------------------|------------------------|
| <b>Náusea</b>                                     | Sensación de malestar o de estómago revuelto junto con una urgencia por vomitar | Clasificar en presencia o en ausencia de náusea                                                                                                                             | Cualitativa nominal dicotómica | Pinazo et al., 2010    |
| <b>Epigastralgia</b>                              | Sensación de dolor en la boca del estómago.                                     | Clasificar en presencia o en ausencia de epigastralgia                                                                                                                      | Cualitativa nominal dicotómica | Pinazo et al., 2010    |
| <b>Dolor abdominal</b>                            | Sensación desagradable en la región comprendida entre el pecho hasta la ingle   | Clasificar en presencia o en ausencia de dolor abdominal                                                                                                                    | Cualitativa nominal dicotómica | Altcheh et al., 2011   |
| <b>Boca seca</b>                                  | Sensación de que no hay suficiente saliva en su boca                            | Clasificar en presencia o en ausencia de boca seca                                                                                                                          | Cualitativa nominal dicotómica | de Pontes et al., 2010 |
| <b>Pirosis</b>                                    | Sensación de ardor dolorosa en el pecho o la garganta                           | Clasificar en presencia o en ausencia de pirosis                                                                                                                            | Cualitativa nominal dicotómica | Pinazo et al., 2010    |
| <b>Vómito</b>                                     | Expulsión violenta y espasmódica del contenido del estómago a través de la boca | Clasificar en presencia o en ausencia de vómito                                                                                                                             | Cualitativa nominal dicotómica | Pinazo et al., 2010    |
| <b>Trastornos metabólicos y nutricionales</b>     |                                                                                 |                                                                                                                                                                             |                                |                        |
| <b>Anorexia</b>                                   | Falta anormal de ganas de comer                                                 | Clasificar en presencia o en ausencia de anorexia                                                                                                                           | Cualitativa nominal dicotómica | Pinazo et al., 2010    |
| <b>Disminución de Peso</b>                        | Pérdida del 10% o más del peso que no se hace de manera voluntaria.             | Identificar disminución de por lo menos un 1.67% de peso corporal durante la toma del medicamento comparado con el peso inicial antes de comenzar el tratamiento etiológico | Cualitativa nominal dicotómica | Valencia et al., 2012  |
| <b>Polifagia</b>                                  | Aumento anormal de la necesidad de comer                                        | Clasificar en presencia o en ausencia de polifagia                                                                                                                          | Cualitativa nominal dicotómica | de Pontes et al., 2010 |
| <b>Trastornos generales del Cuerpo en general</b> |                                                                                 |                                                                                                                                                                             |                                |                        |
| <b>Astenia</b>                                    | Falta o decaimiento considerable de fuerzas.                                    | Clasificar en presencia o en ausencia de astenia                                                                                                                            | Cualitativa nominal dicotómica | de Pontes et al., 2010 |

|                                                                                   |                                                                      |  |
|-----------------------------------------------------------------------------------|----------------------------------------------------------------------|--|
|  | <b>PROTOCOLOS DE INVESTIGACIÓN</b><br><br><b>RED CHAGAS COLOMBIA</b> |  |
| Elaborado por:<br>Juan David Ramírez<br>Coordinador CCDM<br>RED CHAGAS COLOMBIA   | Revisado por:<br>Zulma Cucunubá<br>Gerente<br>RED CHAGAS COLOMBIA    |  |

|                                          |                                                                                                                                                                                                                       |                                                        |                                |                        |
|------------------------------------------|-----------------------------------------------------------------------------------------------------------------------------------------------------------------------------------------------------------------------|--------------------------------------------------------|--------------------------------|------------------------|
| <b>Fiebre</b>                            | Aumento en la temperatura corporal por encima de lo que se considera normal.                                                                                                                                          | Sensación subjetiva de ausencia o presencia de fiebre. | Cualitativa nominal dicotómica | Pinazo et al., 2010    |
| <b>Paraclínicos</b>                      |                                                                                                                                                                                                                       |                                                        |                                |                        |
| <b>Leucocitos</b>                        | Células que están principalmente en la sangre y circulan por ella con la función de combatir las infecciones o cuerpos extraño                                                                                        | Conteo de leucocitos en el hemograma.                  | Cuantitativa discreta de razón | Altcheh et al., 2011   |
| <b>Neutrófilos</b>                       | un tipo de glóbulo blanco, de tipo de granulocito, cuya principal función es fagocitar y destruir a bacterias y participar en el inicio del proceso inflamatorio                                                      | Conteo absoluto de Neutrófilos en el hemograma         | Cuantitativa continua de razón | Carrilero et al., 2011 |
| <b>Eosinofilos</b>                       | Célula fagocitaria del sistema inmunológico que elimina los complejos antígeno-anticuerpo y que por su capacidad citotóxica tiene una función de defensa ante los microorganismos no fagocitables, como los parásitos | Conteo absoluto de Eosinofilos en el hemograma         | Cuantitativa continua de razón | Altcheh et al., 2011   |
| <b>Plaquetas</b>                         | Células que circulan en la sangre, participan en la formación de coágulos sanguíneos y en la reparación.                                                                                                              | Conteo de Plaquetas en el hemograma                    | Cuantitativa discreta de razón | Carrilero et al., 2011 |
| <b>Nitrógeno ureico en la sangre.</b>    | Es un producto que se forma cuando la proteína se descompone.                                                                                                                                                         | Nivel de nitrógeno ureico en sangre                    | Cuantitativa continua de razón | Carrilero et al., 2011 |
| <b>Creatinina</b>                        | Es un producto de degradación de la creatina, una parte importante del músculo.                                                                                                                                       | Nivel de creatinina en sangre                          | Cuantitativa continua de razón | Carrilero et al., 2011 |
| <b>Transaminas a Glutamo oxalacética</b> | Enzima que mide la función citoplasmática y mitocondrial. Del hígado.                                                                                                                                                 | Nivel de Transaminasa Glutamo oxalacética en sangre    | Cuantitativa continua de razón | Altcheh et al., 2011   |
| <b>Transaminas a Glutamo pirúvica.</b>   | Enzima hepática que mide la función citoplasmática.                                                                                                                                                                   | Nivel de Transaminasa Glutamo pirúvica en sangre       | Cuantitativa continua de razón | Altcheh et al., 2011   |

|                                                                                   |                                                                      |  |
|-----------------------------------------------------------------------------------|----------------------------------------------------------------------|--|
|  | <b>PROTOCOLOS DE INVESTIGACIÓN</b><br><br><b>RED CHAGAS COLOMBIA</b> |  |
| Elaborado por:<br>Juan David Ramírez<br>Coordinador CCDM<br>RED CHAGAS COLOMBIA   | Revisado por:<br>Zulma Cucunubá<br>Gerente<br>RED CHAGAS COLOMBIA    |  |

### **Tipo de estudio y diseño general Objetivo 2**

Estudio observacional, analítico tipo cohorte retrospectiva. Para este objetivo, se analizará la incidencia de efectos adversos durante el tratamiento etiológico de los pacientes. La información será obtenida de las historias clínicas.

### **Universo de estudio, selección y tamaño de muestra, unidad de análisis y observación. Criterios de inclusión y exclusión Objetivo 2**

El tamaño de la muestra que será utilizado en este estudio estará conformado aproximadamente por pacientes 785 pacientes quienes han recibido terapia tripanocida en el Instituto Nacional de Salud, Instituto Colombiano de Medicina Tropical, Secretaría de Salud de Boyacá y Secretaría de Salud de Casanare. De acuerdo a las bases de datos, cada una de estas instituciones aglomera un número aproximado de 400, 20, 120 y 125 pacientes respectivamente.

#### **Criterios de Inclusión:**

- Registros de pacientes adultos que hayan recibido tratamiento tripanocida por diagnóstico de enfermedad de Chagas fase crónica.
- Registros de pacientes que tengan por lo menos un control de seguimiento médico en donde se identificaron síntomas relacionados con efectos adversos durante el tratamiento: días 20, 40 o 60.
- Registros de pacientes que tengan por lo menos en 1 control de seguimiento médico durante el tratamiento: días 20, 40 o 60, con resultados de los siguientes exámenes de laboratorio (cuadro hemático, parcial de orina, pruebas de función hepática y renal).

#### **Criterios de exclusión:**

- Registros de pacientes con diagnóstico de enfermedad de Chagas fase aguda.
- Registros de pacientes con edad menor a 18 años.

### **Procedimientos para la recolección de información, instrumentos a utilizar y métodos para el control y calidad de los datos Objetivo 2**

En la sección de tratamiento etiológico de la historia clínica sistematizada se registrarán los efectos adversos a medicamentos tripanocida previamente reconocidas en la literatura científica. Se

|                                                                                   |                                                                      |  |
|-----------------------------------------------------------------------------------|----------------------------------------------------------------------|--|
|  | <b>PROTOCOLOS DE INVESTIGACIÓN</b><br><br><b>RED CHAGAS COLOMBIA</b> |  |
| Elaborado por:<br>Juan David Ramírez<br>Coordinador CCDM<br>RED CHAGAS COLOMBIA   | Revisado por:<br>Zulma Cucunubá<br>Gerente<br>RED CHAGAS COLOMBIA    |  |

realizarán procedimientos de evaluación de la calidad del registro de la información con la revisión del 5% de las variables registradas al 30, 60 y 100% del registro de los datos, seleccionados de manera aleatoria. Variables con errores superiores al 10% o errores superiores al 20% de los datos registrados al momento del análisis obligarán a la revisión de la totalidad de la base. Se realizarán entrenamientos sucesivos a los investigadores en la aplicación de los formatos de recolección de la información y se realizarán pilotos para el ajuste y resolución de dudas específicas en las variables del documento.

### **Dificultades y limitaciones del estudio Objetivo 2**

En esta fase, la historia clínica sistematizada debe tener la información necesaria para garantizar los datos requeridos. Hay riesgo de sesgo de información, en la medida que efectos poco sintomáticos para los pacientes, no estén registrados en las historias clínicas y no se pueda valorar causalidad. Igualmente, puede encontrarse subregistro por interrupción del manejo por parte del paciente debido a los efectos adversos. Además existe riesgo de sesgo por indicación en el cual no es claro como fue el proceso de la asignación para la intervención farmacológica.

### **Plan de análisis de los resultados Objetivo 2**

Una vez exportada la base y evaluada la calidad de los datos, se realizará un análisis exploratorio de la información. Se obtendrán histogramas y box-plot para las variables continuas y gráficos de barras para variables categóricas. Las variables continuas serán descritas como medianas y rango intercuartílico y las variables categóricas como porcentajes. Se evaluarán las pérdidas de información para cada variable, según si son informativas o sugieren sesgo. Pérdidas de información superiores a 20% en la variable implicará su exclusión del análisis y evaluación de sesgo de información. En pérdidas inferiores al 20% se evaluará la probabilidad de sesgo de información y en caso de ameritarlo serán tratadas con estrategias de imputación y análisis de sensibilidad para las mismas.

Se empleará el software Stata 10.0 (StataCorp. 2007. *Stata Statistical Software: Release 10*. College Station, TX: StataCorp LP.)

### **Métodos y modelos de análisis de los datos según tipo de variables Objetivo 2**

El análisis de la incidencia de los efectos adversos se realizará con modelo de sobrevida actuarial libre de efectos adversos, por medio de un gráfico de Kaplan-Meier, que permitirá modelar la ocurrencia de los efectos adversos en el tiempo. Se obtendrá un desenlace combinado de efectos adversos ocurridos, así como la modelación de los diferentes

|                                                                                                                 |                                                                      |  |
|-----------------------------------------------------------------------------------------------------------------|----------------------------------------------------------------------|--|
|  <b>RED CHAGAS</b><br>Colombia | <b>PROTOCOLOS DE INVESTIGACIÓN</b><br><br><b>RED CHAGAS COLOMBIA</b> |  |
| Elaborado por:<br>Juan David Ramírez<br>Coordinador CCDM<br>RED CHAGAS COLOMBIA                                 | Revisado por:<br>Zulma Cucunubá<br>Gerente<br>RED CHAGAS COLOMBIA    |  |

efectos adversos observados. Posteriormente, para evaluar la ocurrencia de los efectos adversos en relación a variables de interés, se aplicará la prueba de Long Rank y se obtendrán Hazard Ratios por medio del modelo de sobrevida de Cox, para identificar potenciales factores de riesgo relacionados con los efectos adversos. Para evaluar causalidad se empleará la escala de Naranjo (WHO, 2003). La severidad de los efectos adversos se evaluará según la escala de la Organización Mundial para la salud. (Coelho et al., 1999)

**Justificación del presupuesto solicitado para cada objetivo específico:**

Para el cumplimiento de este objetivo se contará con la participación de dos Médicos, entre ellos un Joven investigador. Realizarán la detección y descripción de los efectos adversos en los pacientes sometidos a tratamiento. Con el fin de recolectar información de pacientes se realizarán viajes a los departamentos de Casanare y Boyacá, financiados por Colciencias. Finalmente, se contará presupuesto para llevar a cabo la divulgación y publicación de los resultados de la caracterización en eventos científicos y revistas científicas.

**METODOLOGÍA OBJETIVO ESPECÍFICO 3**

**Definición operacional de las variables Objetivo 3:**

Para determinar las variables del presente objetivo, sobre todo aquellas que valoran los cambios en el tiempo del progreso clínico, se tendrá en cuenta que las variables del objetivo 1 que hacen referencia a clase funcional, electrocardiograma, Holter, Ecocardiograma y clasificación de cardiomiopatía chagásica, serán evaluadas y registradas en la historia clínica sistematizada en cada seguimiento anual.

| Variable                     | Definición conceptual                                 | Definición operacional                                                                    | Tipo de variable y escala de medición | Referencia |
|------------------------------|-------------------------------------------------------|-------------------------------------------------------------------------------------------|---------------------------------------|------------|
| <b>Años de seguimiento</b>   | Tiempo contado a partir del fin del tratamiento.      | Tiempo entre el fin de tratamiento hasta la valoración de seguimiento. Expresado en años. | Cuantitativa<br>Continua<br>De razón  | NA         |
| <b>Edad de tratamiento</b>   | Edad cumplida al momento de recibir el tto etiológico | Expresada en años                                                                         | Cuantitativa<br>Continua<br>De razón  | NA         |
| <b>Tiempo de tratamiento</b> | Número de días efectivos que tomó medicamento         | Expresado en número de días.                                                              | Cuantitativa<br>Discreta<br>De razón  | NA         |

|                                                                                   |                                                                      |  |
|-----------------------------------------------------------------------------------|----------------------------------------------------------------------|--|
|  | <b>PROTOCOLOS DE INVESTIGACIÓN</b><br><br><b>RED CHAGAS COLOMBIA</b> |  |
| Elaborado por:<br>Juan David Ramírez<br>Coordinador CCDM<br>RED CHAGAS COLOMBIA   | Revisado por:<br>Zulma Cucunubá<br>Gerente<br>RED CHAGAS COLOMBIA    |  |

| Cambios clínicos                                            |                                                                                                                                                                                                                |                                                                                                                                                                                                                                 |                                                                                                               |                                      |
|-------------------------------------------------------------|----------------------------------------------------------------------------------------------------------------------------------------------------------------------------------------------------------------|---------------------------------------------------------------------------------------------------------------------------------------------------------------------------------------------------------------------------------|---------------------------------------------------------------------------------------------------------------|--------------------------------------|
| <b>Palpitaciones</b>                                        | Latido del corazón, sensible e incómodo para el enfermo, y más frecuente que el normal.                                                                                                                        | Entrevista clínica de seguimiento para definir:<br><ul style="list-style-type: none"> <li>- Ausencia</li> <li>- Mejoría (&lt;frecuencia y &lt;intensidad)</li> <li>- Empeoramiento (&gt;frecuencia o &gt;intensidad)</li> </ul> | Cualitativa<br>Ordinal                                                                                        | Rosas et al, 2002                    |
| <b>Disnea</b>                                               | Dificultad para respirar.                                                                                                                                                                                      |                                                                                                                                                                                                                                 |                                                                                                               |                                      |
| <b>Dolor precordial</b>                                     | Malestar y dolor sentido en el centro del tórax, generalmente de tipo opresivo que puede tener irradiación a cuello, cabeza y brazos.                                                                          |                                                                                                                                                                                                                                 |                                                                                                               |                                      |
| Clase funcional al seguimiento                              |                                                                                                                                                                                                                |                                                                                                                                                                                                                                 |                                                                                                               |                                      |
| <b>Variación de la clase funcional NYHA</b>                 | Relación entre la limitación de actividad física y la presencia de síntomas cardiacos                                                                                                                          | Valoración clínica de seguimiento anual años, Cambio en la CF así:<br><ul style="list-style-type: none"> <li>- Mejoró CF</li> <li>- Igual CF</li> <li>- Empeoró CF</li> </ul>                                                   | Cualitativa<br>Ordinal                                                                                        | Villar JCI, 2002                     |
| <b>Cambio de clasificación miocardiopatía AHA</b>           | Clasificaciones que establecen la relación entre la presencia o ausencia de síntomas cardiacos y los hallazgos de normalidad o anormalidad en el Electrocardiograma, Ecocardiograma o la radiografía de tórax. | Cambio de grupo según AHA durante el seguimiento.<br><ul style="list-style-type: none"> <li>- Mejoró clasificación</li> <li>- Igual clasificación</li> <li>- Empeoró clasificación</li> </ul>                                   | Cualitativa<br>Ordinal                                                                                        | Viotti et al, 2004                   |
| <b>Cambio de clasificación miocardiopatía Cons. Brasil.</b> |                                                                                                                                                                                                                | Cambio de grupo según Consenso de Brasil durante el seguimiento<br><ul style="list-style-type: none"> <li>- Mejoró clasificación</li> <li>- Igual clasificación</li> <li>- Empeoró clasificación</li> </ul>                     | Cualitativa<br>Ordinal                                                                                        | Greenberg B & Kahn AM, 2011          |
| <b>Cambio de clasificación miocardiopatía Andes Mod.</b>    |                                                                                                                                                                                                                | Cambio de grupo según Andes modificada durante el seguimiento.<br><ul style="list-style-type: none"> <li>- Mejoró clasificación</li> <li>- Igual clasificación</li> <li>- Empeoró clasificación</li> </ul>                      | Cualitativa<br>Ordinal                                                                                        | Lauria et al, 2000                   |
| <b>Cambio de clasificación miocardiopatía Kuschnir</b>      |                                                                                                                                                                                                                | Cambio de grupo según Kuschnir durante el seguimiento.<br><ul style="list-style-type: none"> <li>- Mejoró clasificación</li> <li>- Igual clasificación</li> <li>- Empeoró clasificación</li> </ul>                              | Cualitativa<br>Ordinal                                                                                        | Marin-Neto et al, 2009               |
| <b>Numero de hospitalizaciones / año</b>                    |                                                                                                                                                                                                                | Cantidad de hospitalizaciones por año.                                                                                                                                                                                          | Promedio de hospitalizaciones de causa cardiaca por año. Determinado en las consultas anuales de seguimiento. | Cuantitativa<br>Continua<br>De razón |



|                                                                                   |                                                                      |  |
|-----------------------------------------------------------------------------------|----------------------------------------------------------------------|--|
|  | <b>PROTOCOLOS DE INVESTIGACIÓN</b><br><br><b>RED CHAGAS COLOMBIA</b> |  |
| Elaborado por:<br>Juan David Ramírez<br>Coordinador CCDM<br>RED CHAGAS COLOMBIA   | Revisado por:<br>Zulma Cucunubá<br>Gerente<br>RED CHAGAS COLOMBIA    |  |

|                                                                  |                                                                                      |                                                                                                                                   |                                      |                           |
|------------------------------------------------------------------|--------------------------------------------------------------------------------------|-----------------------------------------------------------------------------------------------------------------------------------|--------------------------------------|---------------------------|
| <b>Resucitación cardio-cerebro-pulmonar.</b>                     | Maniobras de soporte vital avanzado en un paro cardio-respiratorio                   | Necesidad de resucitación cardio-cerebro-pulmonar de causa no traumática el algún momento del tiempo post-tratamiento.<br>Si – No | Cualitativa<br>Dicotómica<br>Nominal | 2006                      |
| <b>Cambios ECG/Holter</b>                                        |                                                                                      |                                                                                                                                   |                                      | Petti et al, 2008.        |
| <b>Cambios electro cardiográficos en ECG previamente normal.</b> | Alteraciones compatibles con cardiomiopatía Chagasica en ECG previamente normal.     | Paciente con ecg normal que presenta cambios asociados a enfermedad de Chagas durante el seguimiento anual.<br>Si – No            | Cualitativa<br>Dicotómica<br>Nominal | Rassi A Jr. et al, 2007   |
| <b>Cambios electro cardiográficos nuevos.</b>                    | Nuevas alteraciones compatibles con cardiomiopatía Chagasica.                        | Paciente con ecg alterado para Chagas que evidencia nuevo alteración durante el seguimiento anual.<br>Si – No                     | Cualitativa<br>Dicotómica<br>Nominal | Bestetti, 2001            |
| <b>Cambios en el Holter</b>                                      | Nuevas alteraciones compatibles con cardiomiopatía Chagasica                         | Paciente que muestra cambios en Holter durante el seguimiento anual.<br>Si – No                                                   | Cualitativa<br>Dicotómica<br>Nominal | Lana et al, 2009.         |
| <b>Taquicardia ventricular en Holter.</b>                        | Presencia nueva de TVS                                                               | Paciente presenta durante seguimiento anual nuevo hallazgo de Taquicardia Ventricular Sostenida o No Sostenida.<br>Si – No        | Cualitativa<br>Dicotómica<br>Nominal | Barbosa et al, 2011       |
| <b>Implantación de dispositivo cardiaco.</b>                     | Paciente con enfermedad de Chagas que requiere implantación de dispositivo cardiaco. | Paciente con implantación de dispositivo cardiaco que antes no estaba indicado y en post tratamiento es necesario.<br>Si – No     | Cualitativa<br>Dicotómica<br>Nominal | Mady C & Nacruth R, 1995. |
| <b>Cambios Eco</b>                                               |                                                                                      |                                                                                                                                   |                                      |                           |
| <b>Anormalidades nuevas de la pared del VI</b>                   | Nuevas alteraciones en la movilidad de la pared del VI.                              | Nuevo aneurisma apical o alteración segmentaria de la movilidad del VI.<br>Si – No                                                | Cualitativa<br>Dicotómica<br>Nominal | Fuentes et al, 2012.      |
| <b>Cambios en la dimensión VI en sístole.</b>                    | Alteración de la dimensión del VI en sístole.                                        | Incremento en la dimensión del VI.<br>Si - No                                                                                     | Cualitativa<br>Dicotómica<br>Nominal | Mann. 2011                |
| <b>Cambios dimensión VI al final de la diástole.</b>             | Alteración de la dimensión del VI al final de la diástole.                           | Incremento DVID >5mm/línea de base evidenciado durante el seguimiento anual<br>SI - No                                            | Cualitativa<br>Dicotómica<br>Nominal |                           |
| <b>Cambios en la</b>                                             | Alteración en la FE                                                                  | Disminución de la FE >5%                                                                                                          | Cualitativa                          |                           |

|                                                                                   |                                                                      |  |
|-----------------------------------------------------------------------------------|----------------------------------------------------------------------|--|
|  | <b>PROTOCOLOS DE INVESTIGACIÓN</b><br><br><b>RED CHAGAS COLOMBIA</b> |  |
| Elaborado por:<br>Juan David Ramírez<br>Coordinador CCDM<br>RED CHAGAS COLOMBIA   | Revisado por:<br>Zulma Cucunubá<br>Gerente<br>RED CHAGAS COLOMBIA    |  |

|                                                         |                                                                                                                                                                                                                           |                                                                                                                             |                                |                                                                                                                                                                |
|---------------------------------------------------------|---------------------------------------------------------------------------------------------------------------------------------------------------------------------------------------------------------------------------|-----------------------------------------------------------------------------------------------------------------------------|--------------------------------|----------------------------------------------------------------------------------------------------------------------------------------------------------------|
| <b>Fración de eyección FE.</b>                          |                                                                                                                                                                                                                           | Si – No                                                                                                                     | Dicotómica Nominal             |                                                                                                                                                                |
| <b>Necesidad de Trasplante cardiaco.</b>                | Paciente con enfermedad de Chagas que requiere trasplante cardiaco.                                                                                                                                                       | Paciente con criterios para trasplante cardiaco que antes no estaba indicado y en post tratamiento es necesario.<br>Si – No | Cualitativa Dicotómica Nominal |                                                                                                                                                                |
| <b>Mortalidad</b>                                       |                                                                                                                                                                                                                           |                                                                                                                             |                                |                                                                                                                                                                |
| <b>Muerte súbita</b>                                    | Muerte repentina de origen cardiaco.                                                                                                                                                                                      | Durante el seguimiento hay muerte súbita en el paciente con Chagas.<br>Si – No                                              | Cualitativa Dicotómica Nominal |                                                                                                                                                                |
| <b>Muerte por falla cardiaca</b>                        | Muerte por descompensación progresiva de la función cardiaca.                                                                                                                                                             | Durante el seguimiento hay muerte por falla cardiaca en el paciente con Chagas.<br>Si – No                                  | Cualitativa Dicotómica Nominal |                                                                                                                                                                |
| <b>Laboratorio</b>                                      |                                                                                                                                                                                                                           |                                                                                                                             |                                |                                                                                                                                                                |
| <b>PCR positividad post-tratamiento (Retrospectivo)</b> | Detección de ADN de <i>T.cruzi</i> en muestras de sangre de pacientes que han recibido tratamiento 1 a 11 años previos a la realización de prueba.                                                                        | Positivo / Negativo                                                                                                         | Cualitativa Dicotómica         | Aguiar, et al,2012<br>Murcia et al.,2010<br>Fernandes et al.,2009<br>Braga et al., 2000<br>Lauria-Pires et al, 2000<br>Britto et al., 1999<br>Lana et al.,2009 |
| <b>PCR Positividad (Prospectivo)</b>                    | Detección de ADN de <i>T.cruzi</i> en sangre en pacientes que han recibido tratamiento en muestras recolectadas antes del inicio y al final del tratamiento (60 días) y a los 6, 12 y 24 meses finalizado el tratamiento. | Positivo/ Negativo                                                                                                          | Cualitativa Dicotómica         | Marin Neto et al, 2009<br>Fernandes et al.,2009<br>Murcia et al.,2010                                                                                          |
| <b>PCR Carga parasitaria (Retrospectivo)</b>            | Medición de la concentración de ADN de <i>T.cruzi</i> , equivalente al número de parásitos por mL en muestras de sangre                                                                                                   | 0.0-1x 10 <sup>9</sup><br><br>Clasificación de carga parasitaria:<br><br>Baja >2 par/mL<br>Moderada < 10 par/mL             | Cuantitativa Razón             | Lauria-Pires et al, 2000<br>Braga et al., 2000                                                                                                                 |

|                                                                                   |                                                                      |  |
|-----------------------------------------------------------------------------------|----------------------------------------------------------------------|--|
|  | <b>PROTOCOLOS DE INVESTIGACIÓN</b><br><br><b>RED CHAGAS COLOMBIA</b> |  |
| Elaborado por:<br>Juan David Ramírez<br>Coordinador CCDM<br>RED CHAGAS COLOMBIA   | Revisado por:<br>Zulma Cucunubá<br>Gerente<br>RED CHAGAS COLOMBIA    |  |

|                                               |                                                                                                                                                                                                                                                                                                                                                    |                                                                                                                                  |                                |                                                      |
|-----------------------------------------------|----------------------------------------------------------------------------------------------------------------------------------------------------------------------------------------------------------------------------------------------------------------------------------------------------------------------------------------------------|----------------------------------------------------------------------------------------------------------------------------------|--------------------------------|------------------------------------------------------|
|                                               | de pacientes que han recibido tratamiento 1 a 11 años previos a la realización de prueba.                                                                                                                                                                                                                                                          | Alta > 10 Par/mL                                                                                                                 |                                |                                                      |
| <b>PCR Carga parasitaria (Prospectivo)</b>    | Medición de la concentración de ADN de <i>T. cruzi</i> obtenido de muestras de sangre de pacientes recolectadas, previa al inicio y al final del tratamiento (60 días) y a los 6, 12 y 24 meses finalizado el tratamiento.                                                                                                                         | $0.0-1 \times 10^9$<br><br>Clasificación de carga parasitaria:<br><br>Baja >2 par/mL<br>Moderada < 10 par/mL<br>Alta > 10 Par/mL | Cuantitativa Razón             | Marin Neto et al., 2009                              |
| <b>Tesablot (Retrospectivo y Prospectivo)</b> | Presencia de anticuerpos IgG anti- <i>T. cruzi</i> en suero, detectados por Western blot utilizando TESA (antígenos de secreción y excreción obtenidos mediante cultivo de formas Tripomastigotes de <i>T. cruzi</i> ). En muestras recolectadas al final del tratamiento (60 días) y a los 6, 12 y 24 meses después de finalizado el tratamiento. | Positivo/Negativo                                                                                                                | Cualitativa Dicotómica Nominal | Machado de Asis et al., 2012<br>Bosseno et al., 2006 |
| <b>ELISA Positividad</b>                      | Presencia de anticuerpos IgG anti- <i>T. cruzi</i> en suero unidos al antígeno, detectados mediante espectrofotometría en muestras de suero recolectadas mínimo 3 años                                                                                                                                                                             | Positivo/Negativo                                                                                                                | Cualitativa Dicotómica Nominal | Fernandes et al., 2009<br>Viotti et al., 2011        |

|                                                                                                                         |                                                                                                           |  |
|-------------------------------------------------------------------------------------------------------------------------|-----------------------------------------------------------------------------------------------------------|--|
|  <p><b>RED CHAGAS</b><br/>Colombia</p> | <p align="center"><b>PROTOCOLOS DE INVESTIGACIÓN</b></p> <p align="center"><b>RED CHAGAS COLOMBIA</b></p> |  |
| <p>Elaborado por:<br/>Juan David Ramírez<br/>Coordinador CCDM<br/>RED CHAGAS COLOMBIA</p>                               | <p>Revisado por:<br/>Zulma Cucunubá<br/>Gerente<br/>RED CHAGAS COLOMBIA</p>                               |  |

|                          |                                                                                                                                                                                                                                                                           |                                                          |                                |                                              |
|--------------------------|---------------------------------------------------------------------------------------------------------------------------------------------------------------------------------------------------------------------------------------------------------------------------|----------------------------------------------------------|--------------------------------|----------------------------------------------|
|                          | después de recibir tratamiento.                                                                                                                                                                                                                                           |                                                          |                                |                                              |
| <b>ELISA Absorbancia</b> | Medida espectrofotométrica de anticuerpos IgG-anti T.cruzi en función de su afinidad y concentración, en muestras de suero recolectadas mínimo 3 años después de recibir tratamiento.                                                                                     | 0.0-2.5                                                  | Cuantitativa Intervalo         | Fernandes et al.,2009<br>Viotti et al., 2011 |
| <b>HAI Positividad</b>   | Presencia de anticuerpos IgG anti-T. cruzi en suero, detectados mediante aglutinación, en muestras de suero recolectadas mínimo 3 años después de recibir tratamiento.                                                                                                    | Reactivo/No reactivo                                     | Cualitativa Dicotómica Nominal | Fernandes et al.,2009<br>Viotti et al., 2011 |
| <b>IFI positividad</b>   | Presencia de anticuerpos IgG anti-T. cruzi en suero, detectados mediante fluorescencia, en muestras de suero recolectadas mínimo 3 años después de recibir tratamiento.                                                                                                   | Reactivo/No reactivo                                     | Cualitativa Dicotómica Nominal | Fernandes et al.,2009<br>Viotti et al., 2011 |
| <b>IFI títulos</b>       | Contenido de anticuerpos IgG anti-T.cruzi en diluciones seriadas del suero que se unen a una cantidad estándar de antígeno y determinan el nivel en el cual se produce la reacción positiva, detectada por fluorescencia, en muestras de suero recolectadas mínimo 3 años | 1/8, 1/16, 1/32, 1/64,1/128, 1/256, 1/512,1/1024, 1/2048 | Cualitativa Ordinal            | Fernandes et al.,2009<br>Viotti et al., 2011 |

|                                                                                   |                                                                      |  |
|-----------------------------------------------------------------------------------|----------------------------------------------------------------------|--|
|  | <b>PROTOCOLOS DE INVESTIGACIÓN</b><br><br><b>RED CHAGAS COLOMBIA</b> |  |
| Elaborado por:<br>Juan David Ramírez<br>Coordinador CCDM<br>RED CHAGAS COLOMBIA   | Revisado por:<br>Zulma Cucunubá<br>Gerente<br>RED CHAGAS COLOMBIA    |  |

|                                                          |                                                                                                                                                                                                                                                                             |                                                       |                                      |                                                                      |
|----------------------------------------------------------|-----------------------------------------------------------------------------------------------------------------------------------------------------------------------------------------------------------------------------------------------------------------------------|-------------------------------------------------------|--------------------------------------|----------------------------------------------------------------------|
|                                                          | después de recibir tratamiento.                                                                                                                                                                                                                                             |                                                       |                                      |                                                                      |
| <b>Genotipificación de <i>T. cruzi</i></b>               | Determinación del contenido genómico para clasificación de <i>T. cruzi</i> en Unidades de Tipificación Discretas en ADN de <i>T. cruzi</i> obtenido de pacientes que han recibido tratamiento 1 a 11 años previos a la realización de prueba.                               | DTU's:<br>TcI<br>TcII<br>TcIII<br>TcIV<br>TcV<br>TcVI | Cualitativa<br>Politómica<br>Nominal | Zingales, 2010 y 2012<br>Ramírez et al., 2010<br>Burgos et al., 2010 |
| <b>Genotipificación de <i>T. cruzi</i> (Prospectivo)</b> | Determinación del contenido genómico para clasificación de <i>T. cruzi</i> en Unidades de Tipificación Discretas en ADN de <i>T. cruzi</i> de muestras obtenidas previas al inicio y al final del tratamiento (60 días) y a los 6, 12 y 24 meses finalizado el tratamiento. | DTU's:<br>TcI<br>TcII<br>TcIII<br>TcIV<br>TcV<br>TcVI | Cualitativa<br>Politómica<br>Nominal | Zingales, 2010 y 2012<br>Ramírez et al., 2010<br>Burgos et al., 2010 |

### Tipo de estudio y diseño general Objetivo 3

Cohorte prospectiva de pacientes con antecedente de tratamiento farmacológico por enfermedad de Chagas. Los pacientes registrados en la base de datos con este antecedente serán identificados por los investigadores de este estudio. Quienes cumplan con los criterios de inclusión y exclusión y previa obtención del consentimiento informado serán incluidos en esta fase del estudio, para ser interrogados, para toma de muestras hemáticas y exámenes cardiológicos.

### Universo de estudio, selección y tamaño de muestra, unidad de análisis y observación. Criterios de inclusión y exclusión Objetivo 3.

Para el desarrollo de este objetivo se realizará convocatoria de los 400 pacientes tratados en el INS, se espera al menos lograr el 50% de la muestra (200 pacientes).

|                                                                                   |                                                                      |  |
|-----------------------------------------------------------------------------------|----------------------------------------------------------------------|--|
|  | <b>PROTOCOLOS DE INVESTIGACIÓN</b><br><br><b>RED CHAGAS COLOMBIA</b> |  |
| Elaborado por:<br>Juan David Ramírez<br>Coordinador CCDM<br>RED CHAGAS COLOMBIA   | Revisado por:<br>Zulma Cucunubá<br>Gerente<br>RED CHAGAS COLOMBIA    |  |

**Criterios de Inclusión:**

- Pacientes adultos que hayan recibido tratamiento tripanocida por diagnóstico de enfermedad de Chagas fase crónica.
- Pacientes con seguimiento post tratamiento que pertenezcan a la cohorte objeto de estudio.

**Criterios de exclusión:**

- Pacientes que no presenten información completa que permita el seguimiento (dirección, teléfono, etc.) en bases de datos.
- Pacientes que no tengan resultados de exámenes cardiacos previos (antes de iniciar tratamiento)

**Procedimientos para la recolección de información, instrumentos a utilizar y métodos para el control y calidad de los datos Objetivo 3.**

A los pacientes quienes cumplan con los criterios de Inclusión se les realizará al momento del registro y luego anualmente valoración clínica para determinar la clase funcional de acuerdo a la clasificación NYHA. Además, valoración con electrocardiograma/Holter y Ecocardiograma para determinar cambios en el sistema eléctrico y estructural del corazón, respectivamente con periodicidad anual. De esta manera se clasificaran de acuerdo a las escalas actuales que determinan la evolución de la cardiomiopatía chagastica, se usaran las clasificaciones AHA (American Heart Association), Consenso de Brasil, Andes modificada y Kuschnir. Todos los datos serán registrados en la historia clínica sistemática.

Se llevará a cabo toma de muestras de sangre en tubo seco y en tubos con EDTA, para realizar análisis serológicos (ELISA, IFI, HAI y TESA-Blot) y moleculares (PCR), respectivamente. La primera toma de muestra se realizará al momento de la inclusión luego a los seis meses y posteriormente cada año. (ver anexo 1 y 2)

La información será digitada en la historia clínica sistematizada. Se realizarán entrenamientos sucesivos a los investigadores en la aplicación de los formatos de recolección de la información y se realizarán pilotos para el ajuste y resolución de dudas específicas en las variables del documento. Se harán dos evaluaciones de la calidad de la información registrada en los formatos, por medio de verificación de una muestra aleatoria del total de los formatos registrados, correspondiente al 5% de las mismas. Errores superiores al 20% del total de variables registradas obligarán a la revisión del total de la información. Se realizarán entrenamientos sucesivos a los investigadores en la aplicación de los formatos de recolección de la información y se realizarán pilotos para el ajuste y resolución de dudas específicas en las variables del documento.

|                                                                                   |                                                                      |  |
|-----------------------------------------------------------------------------------|----------------------------------------------------------------------|--|
|  | <b>PROTOCOLOS DE INVESTIGACIÓN</b><br><br><b>RED CHAGAS COLOMBIA</b> |  |
| Elaborado por:<br>Juan David Ramírez<br>Coordinador CCDM<br>RED CHAGAS COLOMBIA   | Revisado por:<br>Zulma Cucunubá<br>Gerente<br>RED CHAGAS COLOMBIA    |  |

### **Dificultades y limitaciones del estudio Objetivo 3**

La principal limitación de este estudio se relaciona con sesgo de selección por parte de los sujetos elegibles al mismo, quienes pueden no ser incluidos en el mismo debido al estatus vital potencialmente relacionado con la misma enfermedad de Chagas. Habría que limitar claramente el periodo transcurrido desde la ocurrencia de la enfermedad con el momento de esta entrevista para prever las pérdidas debidas a fallecimientos o a la no localización de los sujetos del estudio. Inhibición de muestras: la adición de clorhidrato de guanidina a la muestra de sangre aunque es indispensable para su conservación y digestión proteica, eventualmente puede generar inhibición del ADN produciendo que en estas muestras no pueda realizarse la detección del parásito.

### **Plan de análisis de los resultados Objetivo 3**

A partir de la revisión de la literatura científica se extrajeron variables que permitieran la medición, evaluación y clasificación de la tendencia de respuesta al tratamiento.

Se contemplaran tres aspectos: parasitológico, serológico, ecocardiográfico y eventualmente clínico, con estos, se diseñara un score para clasificar la tendencia de respuesta al tratamiento etiológico de la enfermedad de Chagas en fase crónica y de acuerdo a este se catalogarán como:

- A. Grandes Respondedores
- B. Medianos Respondedores
- C. No respondedores

Se empleará el software Stata 10.0 (StataCorp. 2007. *Stata Statistical Software: Release 10*. College Station, TX: StataCorp LP.)

### **Métodos y modelos de análisis de los datos según tipo de variables Objetivo 3**

Para evaluar el rendimiento operativo del score generado, se realizará una regresión logística multivariada con las variables incluidas en el score, con un número específico de pacientes a partir de la cual, por medio de una curva ROC, se obtendrá el rendimiento operativo que dará información sobre validez y seguridad del mismo.

Una vez validado la escala se someterá a todos los pacientes incluidos en este objetivo con el fin de determinar la respuesta al tratamiento etiológico.

### **CONSIDERACIONES ETICAS GENERALES**

Durante el desarrollo del estudio, se obtendrá de los sujetos participantes,

|                                                                                                                 |                                                                      |  |
|-----------------------------------------------------------------------------------------------------------------|----------------------------------------------------------------------|--|
|  <b>RED CHAGAS</b><br>Colombia | <b>PROTOCOLOS DE INVESTIGACIÓN</b><br><br><b>RED CHAGAS COLOMBIA</b> |  |
| Elaborado por:<br>Juan David Ramírez<br>Coordinador CCDM<br>RED CHAGAS COLOMBIA                                 | Revisado por:<br>Zulma Cucunubá<br>Gerente<br>RED CHAGAS COLOMBIA    |  |

consentimiento informado de acuerdo a lo estipulado por el Centro Coordinador de Datos y Muestras (CCDM), una copia del mismo será entregada al paciente una vez se obtenga.

Para garantizar la confidencialidad de la información registrada en la historia clínica sistematizada, se generará una lista donde se codificará el registro de cada paciente. La codificación de los datos registrados en la base de datos limitará la individualización de la información registrada en la misma. Igualmente, los investigadores y digitadores firmarán tanto un acuerdo de confidencialidad, donde se comprometen a no divulgar los datos relacionados con el estudio. La base de datos será de acceso restringido.

### **PRESUPUESTO GLOBAL**

| <b>Rubros</b>                        | <b>Financiado</b>  | <b>Contrapartida</b> |                 | <b>Total</b>       |
|--------------------------------------|--------------------|----------------------|-----------------|--------------------|
|                                      |                    | <b>Ejecutora(s)</b>  | <b>Otras</b>    |                    |
| COSTOS OPERATIVOS                    | 1,000,000          | 1,500,000            | 0               | 2,500,000          |
| EQUIPOS                              | 151,740,000        | 66,000,000           | 0               | 217,740,000        |
| EVENTOS ACADÉMICOS                   | 4,000,000          | 2,000,000            | 0               | 6,000,000          |
| GASTOS DE VIAJES                     | 10,000,000         | 10,000,000           | 0               | 20,000,000         |
| MATERIALES                           | 85,359,600         | 40,000,000           | 0               | 125,359,600        |
| PRESTACIÓN DE SERVICIOS TÉCNICOS     | 2,000,000          | 0                    | 0               | 2,000,000          |
| PUBLICACIONES Y PATENTES             | 5,000,000          | 0                    | 0               | 5,000,000          |
| RECURSO HUMANO CIENTÍFICO Y DE APOYO | 249,678,587        | 40,000,000           | 60,000,000      | 349,678,587        |
| <b>Totales</b>                       | <b>508,778,187</b> | <b>159500000</b>     | <b>60000000</b> | <b>728,278,187</b> |

### **JUSTIFICACION DEL PRESUPUESTO.**

Para cumplir a cabalidad con los objetivos mencionados, se requiere un equipo de recurso humano el cual consta profesionales en Medicina, Bacteriología y un auxiliar técnico en Enfermería, financiados por



|                                                                                   |                                                                      |  |
|-----------------------------------------------------------------------------------|----------------------------------------------------------------------|--|
|  | <b>PROTOCOLOS DE INVESTIGACIÓN</b><br><br><b>RED CHAGAS COLOMBIA</b> |  |
| Elaborado por:<br>Juan David Ramírez<br>Coordinador CCDM<br>RED CHAGAS COLOMBIA   | Revisado por:<br>Zulma Cucunubá<br>Gerente<br>RED CHAGAS COLOMBIA    |  |

Colciencias, quienes se encargarán de llevar a cabo la caracterización de la cohorte de pacientes, su tratamiento etiológico, efectos adversos y respuesta terapéutica. Se realizarán viajes a los departamentos de Casanare y Boyacá, con el fin de cumplir con los objetivos trazados en pacientes presentes en dichos departamentos.

Se contará con una asesoría en Epidemiología para realizar los análisis de la información recolectada y se participará en un curso y una capacitación en técnicas moleculares de diagnóstico y genotipificación de T.cruzi.

Se adquirirán equipos médicos (ecocardiógrafo, electrocardiógrafo, tensiómetro, fonendoscopio, balanza, entre otros), además material tipográfico (formatos solicitud de exámenes, recetas, etc) que permitirán la atención y valoración cardiológica de los pacientes.

Se comprarán equipos de Biología molecular (Robot para extracción de ADN y Nanodrop) para extracción y cuantificación de ADN, diagnóstico molecular, determinación de carga parasitaria y genotipificación de T.cruzi. Adicionalmente, se comprarán reactivos (Kits, iniciadores, sondas, dNTPs, entre otros) necesarios para ejecutar pruebas moleculares (PCR-RT) y pruebas serológicas (ELISA, HAI, IFI y TESA-blot).

Finalmente, se destinará presupuesto para llevar a cabo la divulgación de los resultados de la caracterización en dos eventos científicos nacionales, aun no definidos, dos publicaciones en revistas indexadas, aún no definidas. En cada uno de los eventos científicos participarán 2 personas.

#### **PRODUCTOS ESPERADOS (Entregables y fechas de entrega)**

| <b>RESULTADO/PRODUCTO ESPERADO</b>                                                                                              | <b>FECHA DE ENTREGA DEL PRODUCTO</b> | <b>ENTREGABLE</b>                                                                  |
|---------------------------------------------------------------------------------------------------------------------------------|--------------------------------------|------------------------------------------------------------------------------------|
| Estudiante de maestría en ciencias biológicas o salud pública.                                                                  | Mes 36 de 36                         | Certificación de la Institución Educativa                                          |
| Estudiante de medicina encargado de transcripción de historias clínicas.                                                        | Mes 36 de 36                         | Certificación de la Institución Educativa                                          |
| Artículo en revista acerca de la utilidad de métodos moleculares en el diagnóstico de la enfermedad de Chagas.                  | Mes 30 de 36                         | Carta ó correo electrónico de aceptación de la publicación en una Revista Indexada |
| Artículo acerca de caracterización de cohorte de pacientes su tratamiento etiológico, efectos adversos y respuesta terapéutica. | Mes 30 de 36                         | Carta ó correo electrónico de aceptación de la publicación en una Revista Indexada |

|                                                                                   |                                                                      |  |
|-----------------------------------------------------------------------------------|----------------------------------------------------------------------|--|
|  | <b>PROTOCOLOS DE INVESTIGACIÓN</b><br><br><b>RED CHAGAS COLOMBIA</b> |  |
| Elaborado por:<br>Juan David Ramírez<br>Coordinador CCDM<br>RED CHAGAS COLOMBIA   | Revisado por:<br>Zulma Cucunubá<br>Gerente<br>RED CHAGAS COLOMBIA    |  |

|                                                                                                      |              |                                                                                                         |
|------------------------------------------------------------------------------------------------------|--------------|---------------------------------------------------------------------------------------------------------|
| Ponencia acerca de los hallazgos sobre respuesta al tratamiento etiológico para enfermedad de Chagas | Mes 12 de 36 | Constancia de presentación de resultados                                                                |
| Ponencia acerca de los resultados en cuanto a caracterización clínica y RAM                          | Mes 24 de 36 | Constancia de presentación de resultados                                                                |
| Estandarización de historia clínica unificada y sistematizada                                        | Mes 6 de 36  | Historia clínica unificada y sistematizada                                                              |
| Caracterización cohorte de pacientes                                                                 | Mes 18 de 36 | Informe detallado de caracterización de pacientes                                                       |
| Estandarización de pruebas moleculares                                                               | Mes 18 de 36 | Protocolo de estandarización de pruebas moleculares                                                     |
| Evaluación postratamiento                                                                            | Mes 24 de 36 | Informe detallado de resultados y análisis de variables que permiten realizar evaluación postratamiento |

#### **CRONOGRAMA DEL PROTOCOLO (Actividades con fechas estimadas).**

| <b>Actividad</b>                                                                                    | <b>MM/AAAA</b> |
|-----------------------------------------------------------------------------------------------------|----------------|
| Revisión bibliográfica                                                                              | Continua       |
| Desarrollo y aprobación avales institucionales científicos y éticos para la ejecución del protocolo | 11/2012        |
| Preparación de infraestructura                                                                      | 12/2012        |
| Organización de historias clínicas                                                                  | 12/2012        |
| Selección de pacientes                                                                              | 12/2012        |
| Recolección de datos y muestras                                                                     | 01/2013        |
| Análisis de pruebas de laboratorio                                                                  | 02/2013        |
| Análisis de datos                                                                                   | 06/2013        |
| Informes preliminares                                                                               | 07/2013        |
| Presentación en evento científico                                                                   | 2013 – 2014    |
| Sometimiento de manuscrito revista indexada                                                         | 2014           |
| Informe final                                                                                       | 2014           |

|                                                                                   |                                                                      |  |
|-----------------------------------------------------------------------------------|----------------------------------------------------------------------|--|
|  | <b>PROTOCOLOS DE INVESTIGACIÓN</b><br><br><b>RED CHAGAS COLOMBIA</b> |  |
| Elaborado por:<br>Juan David Ramírez<br>Coordinador CCDM<br>RED CHAGAS COLOMBIA   | Revisado por:<br>Zulma Cucunubá<br>Gerente<br>RED CHAGAS COLOMBIA    |  |

## REFERENCIAS BIBLIOGRÁFICAS.

Acquatella H. Echocardiography in Chagas Heart Disease. *Circulation*. 2007;115:1124-113.

Aguiar C.; Batista AM.; Pavan TBS.; Almeida EA.; Guariento ME.; Wanderley J.S.et. al Serological profiles and evaluation of parasitaemia by PCR and blood culture in individuals chronically infected by *Trypanosoma cruzi* treated with benznidazole. *Trop Med Int Health* 2012; 17:3 (368-373)

Alarcón González R.; Caballero Castellanos H.; Navaza Buzón D.; Favier Torres MA.; Yais Elcea AM. Caracterización de pacientes con Enfermedad de Chagas. Municipio Guanare, Estado Portuguesa. Enero a Julio de 2010. III Congreso Regional de Medicina Familiar Wonca Iberoamericana – CIMF y X Seminario Internacional de Atención Primaria de Salud. Versión virtual; 2010 Mar 12-16; La Habana, Cuba. 2010

Itchek J.; Moscatelli G.; Moroni S.; Garcia-Bournissen F.; Freilij H. Events After the Use of Benznidazole in Infants and Children With Chagas Disease. *Pediatrics* 2011; 127: 212-218

Andrade JP.; Marin Neto JA.; Paola A.; Vilas-Boas F.; Moraes Oliveira GM.; Bacal F.; Bocchi EA. I Latin American Guidelines for the Diagnosis and Treatment of Chagas' Heart Disease. Executive Summary. *Arq Bras Cardiol* 2011;96(6):434-442.

Avila Tang E.; Matsui E.; Wiesch DG.; Samet JM. Epidemiology of Asthma and Allergic Disease. In Adkinson NF. Middleton's Allergy: Principles and Practice, 7th ed. Maryland: Mosby; 2008. p. 715-756

Avila HA.; Sigman DS.; Cohen LM.; Millikan RC.; Simpson L. Polymerase chain reaction amplification of *Trypanosoma cruzi* kinetoplast minicircle DNA isolated from whole blood lysates: diagnosis of chronic Chagas' disease. *Mol Biochem Parasitol*. 1998;48(2):211-21

Barbosa MM.; Nunes MCP. Estratificación del riesgo en la enfermedad de Chagas. *Rev Esp Cardiol*. 2012;65(Supl 2):17-21

Basquiera AL.; Sembaj A.; Aguerri AM.; Omelianiuk M.; Guzmán S.; Barral JM.; Caeiro TF.; Madoery RJ.; Salomone OA. Risk progression to chronic Chagas cardiomyopathy: influence of male sex and of parasitaemia detected by polymerase chain reaction. *Heart* 2003; 89:1186-1190.

Bern C. Antitrypanosomal Therapy for Chronic Chagas' Disease. *N Eng J Med* 2011.; 364:2527-34

Bestetti RB. Predictors of unfavourable prognosis in chronic Chagas' disease. *Trop. Med. Int. Health* 2001;6(6):476-83.

|                                                                                   |                                                                      |  |
|-----------------------------------------------------------------------------------|----------------------------------------------------------------------|--|
|  | <b>PROTOCOLOS DE INVESTIGACIÓN</b><br><br><b>RED CHAGAS COLOMBIA</b> |  |
| Elaborado por:<br>Juan David Ramírez<br>Coordinador CCDM<br>RED CHAGAS COLOMBIA   | Revisado por:<br>Zulma Cucunubá<br>Gerente<br>RED CHAGAS COLOMBIA    |  |

Bosseno MF.; Bastrenta B.; Brenière SF.; Flores-Chavez M.; Dalenz J.; Revollo S.et. al. Polymerase chain reaction detection and serologic follow-up after treatment with benznidazole in Bolivian children infected with a natural mixture of Trypanosoma cruzi I and II. Am J Trop Med Hyg 2006; 75:3 (497-501)

Braga MS.; Lauria-Pires L.; Argañaraz ER.; Nascimento RJ.; Teixeira ARL. Persistent infections in chronic chagas' disease patients treated with anti-Trypanosoma cruzi nitroderivatives. Rev Inst Med Trop Sao Paulo 2000; 42:3 (157-161)

Brasil P.; Castro L.; Masslocher-Moreno A.; Sangenis L.; Braga JU. ELISA versus PCR for diagnosis of chronic Chagas disease: systematic review and meta-analysis. Brasil et al. BMC Infectious Diseases 2010, 10:337.

Britto C.; Cardoso MA.; Marques P.; Fernandes O.; Morel CM. Polymerase chain reaction detection: new insights into the diagnosis of chronic Chagas disease. Mem Inst Oswaldo Cruz. 1999;94 Suppl 1:305-6

Britto C.; Cardoso MA.; Ravel C.; Santoro A.; Pereira JB.; Coura JR. et al. Trypanosoma cruzi: parasite detection and strain discrimination in chronic chagasic patients from northeastern Brazil using PCR amplification of kinetoplast DNA and nonradioactive hybridization. Exp Parasitol. 1995 Dec;81(4):462-71.

Britto C.; Cardoso MA.; Wincker P.; Morel CM. A simple protocol for the physical cleavage of Trypanosoma cruzi kinetoplast DNA present in blood samples and its use in polymerase chain reaction (PCR)-based diagnosis of chronic Chagas disease. Mem Inst Oswaldo Cruz. 1993 Jan-Mar;88(1):171-2.

Britto C.; Cardoso A.; Silveira C.; Macedo V.; Fernandes O. Polymerase chain reaction (PCR) as a laboratory tool for the evaluation of the parasitological cure in Chagas disease after specific treatment. Medicina 1999; 59 Suppl 2 (176-178)

Burgos JM.; Diez M.; Vigliano C.; Bisio M.; Risso M.; Duffy T. et. al. Molecular identification of Trypanosoma cruzi discrete typing units in end-stage chronic Chagas heart disease and reactivation after heart transplantation. Clin Infect Dis. 2010; Sep 1;51(5):485-95.

Campbell-Lendrum DH.; Angulo VM.; Esteban L.; Tarazona Z.; Parra GJ.; Restrepo M. et al. House-level risk factors for triatomine infestation in Colombia. Int. J. Epidemiol 2007; 36(4): 866-872.

Carrilero B.; Murcia L.; Martínez-Lage L. Segovia M. Side effects of benznidazole treatment in a cohort of patients with Chagas disease in non-endemic country. Rev Esp Quimioter 2011; 24: 123-6.

|                                                                                   |                                                                      |  |
|-----------------------------------------------------------------------------------|----------------------------------------------------------------------|--|
|  | <b>PROTOCOLOS DE INVESTIGACIÓN</b><br><br><b>RED CHAGAS COLOMBIA</b> |  |
| Elaborado por:<br>Juan David Ramírez<br>Coordinador CCDM<br>RED CHAGAS COLOMBIA   | Revisado por:<br>Zulma Cucunubá<br>Gerente<br>RED CHAGAS COLOMBIA    |  |

Chaves AM.; Villar JC.; Luengas CA.; Villamizar MC.; Hernández L.; Celis A. et. al. Función diastólica en sujetos con serología positiva para enfermedad de Chagas procedentes del estudio CHICAMOCHA. Rev ColombCardiol 2006; 13: 79-84.

Chobanian AV.; Bakris GL.; Black HR.; Cushman WC.; Green LA.; Izzo JL. et. al. The Seventh Report of the Joint National Committee on Prevention, Detection, Evaluation and Treatment of High Blood Pressure and the National High Blood Pressure Education Program Coordinating Committee. JAMA 2003; 289: 2560-72.

Coelho H.L.; Arrais P.S.; Gomes A.P. Ceara State Pharmacovigilance System: a year of experience. Cad Saude Publica 1999; 15: 631-40.

Coronado X.; Ortiz S.; Lastra O.; Larrondo M.; Rozas M.; Solari A: Instability of Trypanosoma cruzi DNA in blood lysates: importance for PCR DNA-based diagnosis. Mol Diagn 2005, 9:35-40.

Coura J.R.; de Abreu L.L.; Willcox H.P.; Petana W. Comparative controlled study on the use of benznidazole, nifurtimox and placebo, in the chronic form of Chagas' disease, in a field area with interrupted transmission. Rev Soc Bras Med Trop. 1997; 30: 139-44.

Crema E.; Resende Silva EC.; Melo Franciscon P.; Rodrigues Júnior V.; Martins Júnior A.; Oliveira Teles CJ. et. al. Prevalence of cholelithiasis in patients with chagasic megaesophagus. Rev Soc Bras Med Trop 2011; 44(3): 324-326.

Crocco L.; Rodríguez C.; Catalá S.; Nattero J. Chagas disease in Argentina: tools for schoolchildren to exercise vector surveillance and identify household risk factors. Cad. Saúde Pública 2005; 21(2):646-651.

Crowther JR. ELISA: Theory and practice: Methods in molecular biology. Totowa.; New Jersey; 1995

Cucunuba ZM.; Florez AC.; Cardenas A.; Pavia P.; Montilla M.; Aldana R. et. al. Prevalence and Risk Factors for Chagas Disease in Pregnant Women in Casanare, Colombia. Am J Trop Med Hyg 2012; 87:837-842.

Cummings P. Effects of differences between peer reviewers suggested by authors and by editors. JAMA. 2006;296:1231.

Departamento Administrativo Nacional de Estadística (DANE). Cartilla de conceptos básicos e indicadores demográficos. Colombia: Dane; 2007.

Departamento administrativo nacional de estadística (DANE). Clasificación Internacional Uniforme de Ocupaciones Adaptada para Colombia CIUO-88 A. C. Colombia: DANE; 2005.

|                                                                                   |                                                                      |  |
|-----------------------------------------------------------------------------------|----------------------------------------------------------------------|--|
|  | <b>PROTOCOLOS DE INVESTIGACIÓN</b><br><br><b>RED CHAGAS COLOMBIA</b> |  |
| Elaborado por:<br>Juan David Ramírez<br>Coordinador CCDM<br>RED CHAGAS COLOMBIA   | Revisado por:<br>Zulma Cucunubá<br>Gerente<br>RED CHAGAS COLOMBIA    |  |

Departamento administrativo nacional de estadística (DANE). Colombia una nación multicultural, su diversidad étnica. Colombia: Dane; 2007.

Dorn PL.; Selgean S.; Guillot M: Simplified method for preservation and polymerase chain reaction-amplification of Trypanosoma cruzi DNA in human blood. Mem Inst Oswaldo Cruz 1997, 92:253-255.

Duffy T.; Bisio M.; Burgos J.M.; Levin M.J.; Schijman A.G.; Altcheh J.; Freilij H.; Diez M.; Favaloro R.R. Accurate real-time PCR strategy for monitoring bloodstream parasitic loads in chagas disease patients PLoS Neglected Tropical Diseases 2009 3:4

Fernandes CD.; Tiecher FM.; BalbinotMM.;Liarte DB.; Scholl D.; Steindel M.et.al. Efficacy of benznidazol treatment for asymptomatic chagasic patients from state of Rio Grande do Sul evaluated during a three years follow-up. Mem Inst Oswaldo Cruz 2009; 104:1 (27-32)

Fuentes R.; Maturana M.; de la Cruz R. Efi cacia de nifurtimox para el tratamiento de pacientes con enfermedad de Chagas crónica. Rev Chil Infect 2012; 29 (1): 82-86

Galvão L.; Chiari E.; Macedo AM.; Luquetti AO.; Silva SA.; Andrade A. et al PCR Assay for Monitoring Trypanosoma cruzi Parasitemia in Childhood after Specific Chemotherapy. Journal of Clinical Microbiology 2003 41:11

Garzon SA.; Lorga AM.; Nicolau JC. Electrocardiography in Chagas' heart disease São Paulo Med J. 1995; 113(2): 802-13.

Gilbert C. Academic press Dictionary of science and Technology.Editorial : Academic press; 1992.

Godlee F. Publishing study protocols: making them visible will improve registration, reporting and recruitment. BMC News and Views. 2001;2:4.

Gómez EA.; Senior JM.; Vélez S.; Navarrete S.; Sánchez DF.; Roa NL. et. al. Guías colombianas sobre la evaluación y el manejo de la falla cardíaca crónica del adulto. Rev Col Cardiol 2007;14(supl2):13-50.

Greenberg B.; Kahn AM. Clinical Assessment of Heart Failure. In: Bonow RO. Braunwald's Heart Disease - A Textbook of Cardiovascular Medicine, 9th ed. St. Louis: Elsevier; 2011. p. 505-516.

Grupi CJ.; Moffa PJ.;Barbosa SA., Sanches PC.; Barragan Filho EG.; V. Bellotti VM. Holter monitoring in Chagas' heart disease. São Paulo Med J 1995; 113(2): 835-40.

Guhl F.; Nichols R.S.; Montoya R.; Rosas F.; Velasco V.M.; Mora E. et. al. Rápida negativización serológica después del tratamiento etiológico para enfermedad de Chagas en un grupo de escolares colombianos. Curso de Diagnóstico, Manejo y Tratamiento de la enfermedad de Chagas OPS/MSF/SSA 2006; 205-212.

|                                                                                   |                                                                      |  |
|-----------------------------------------------------------------------------------|----------------------------------------------------------------------|--|
|  | <b>PROTOCOLOS DE INVESTIGACIÓN</b><br><br><b>RED CHAGAS COLOMBIA</b> |  |
| Elaborado por:<br>Juan David Ramírez<br>Coordinador CCDM<br>RED CHAGAS COLOMBIA   | Revisado por:<br>Zulma Cucunubá<br>Gerente<br>RED CHAGAS COLOMBIA    |  |

Guyatt G. Preparing a research protocol to improve chances for success. *J Clin Epidemiol.* 2006;59:893-9.

Hidron AI.; Gilman RH.; Justiniano J.; Blackstock AJ.; LaFuente C.; et al. (2010) Chagas Cardiomyopathy in the Context of the Chronic Disease Transition. *PLoS Negl Trop Dis* 4(5): e688

Higuchi R.; Fokler C.; Dollinger G.; Watson R. Kinetic PCR analysis: Real-time monitoring of DNA amplification reactions. *Bio/Technology* 1993;11:1026-30.

Hunt SA.; Abraham WT.; Chin MH.; Feldman AM.; Francis GS.; Ganiats TG. et. al. ACC/AHA 2005 Guideline Update for the Diagnosis and Management of Chronic Heart Failure in the Adult. *Circulation.* 2005;112:154-235.

Ianni BM.; Mady C.; Arteaga E.; Fernandes F. Doenças Cardiovasculares Observadas durante o Seguimento de um Grupo de Pacientes na Forma Indeterminada da Doença de Chagas. *Arq Bras Cardiol* 1998; 71(1): 21-24

Isselbacher EM.; Kligerman SJ.; Lam KM.; Hurtado RM. A 47-Year-Old Man with Abdominal and Flank Pain [case records]. *N Engl J Med* 2010;362:254-62.

Lana M.; Lopes LA.; Martins HR.; Bahia MT.; Machado-de-Assis GF.; Wendling Ap. et. al. Clinical and laboratory status of patients with chronic Chagas disease living in a vector-controlled area in Minas Gerais, Brazil, before and nine years after aetiological treatment. *Mem Inst Oswaldo Cruz* 2009;104(8): 1139-1147.

Lauria-Pires L.; Braga MS.; Vexenat AC.; Nitz N.; Simões-Barbosa A.; Tinoco DL. et. al. Progressive chronic chagas heart disease ten years after Treatment with anti-trypanosoma cruzi nitroderivatives. *Am. J. Trop. Med. Hyg* 2000;63(3, 4):111–118.

Machado-de-Assis GF.; Silva AR.; Do Bem VA.; Bahia MT.; Martins-Filho OA.; Dias J. et. al. Posttherapeutic cure criteria in Chagas' disease: conventional serology followed by supplementary serological.; parasitological.; and molecular tests. *Clin Vaccine Immunol* 2012; Aug;19(8):1283-91.

Mady C.; Nacrueth R. Natural history of chronic Chagas' heart disease: prognosis factors. *São Paulo Med J.* 1995; 113(2): 791-796.

Mann DL. Management of Heart Failure Patients with Reduced Ejection Fraction Electrocardiography. In: Bonow RO. Braunwald's Heart Disease - A Textbook of Cardiovascular Medicine, 9th ed. St. Louis: Elsevier; 2011. p. 543 - 577

Marin-Neto JA.; Rassi A Jr.; Avezum A Jr.; Mattos AC.; Rassi A.; Morillo CA. et. al. The BENEFIT trial: testing the hypothesis that trypanocidal therapy is beneficial for patients with chronic Chagas heart disease. *Mem Inst Oswaldo Cruz.* 2009;104(Suppl 1):319-24.

|                                                                                   |                                                                          |  |
|-----------------------------------------------------------------------------------|--------------------------------------------------------------------------|--|
|  | <b>PROTOCOLOS DE<br/>INVESTIGACIÓN</b><br><br><b>RED CHAGAS COLOMBIA</b> |  |
| Elaborado por:<br>Juan David Ramírez<br>Coordinador CCDM<br>RED CHAGAS COLOMBIA   | Revisado por:<br>Zulma Cucunubá<br>Gerente<br>RED CHAGAS COLOMBIA        |  |

Matsuda NM.; Miller SM.; Évora PRB. The chronic gastrointestinal manifestations of chagas disease. Clinics 2009; 64(12): 1219-24.

Ministerio da Saude. Secretaria de Vigilancia em Saude. Brazilian Consensus on Chagas disease. Rev Soc Bras Med Trop 2005;38 (suppl 3): 7-29

Ministerio de la Protección Social MPS, República de Colombia. Guía de Atención Clínica de la enfermedad de Chagas 2010.

Mirvis DM.; Goldberger AL. Electrocardiography. In: Bonow RO. Braunwald's Heart Disease - A Textbook of Cardiovascular Medicine, 9th ed. St. Louis: Elsevier; 2011. p. 126-167

Mora G.; Echeverry MC.; Rey GE.; López MC.; Posada LM.; Rivas FA. Frecuencia de anticuerpos anti-Trypanosoma cruzi en pacientes portadores de marcapasos de la Clínica San Pedro Claver de Bogotá. Biomédica 2007;27:483-9.

Moreira OC.;Ramírez JD.; Velázquez E.;Melo MF.; Lima-Ferreira C.;Guhl F.; Sosa-Estani S.; Marin-Neto JA.;Morillo CA.;BrittoC. Towards the establishment of a consensus real-time qPCR to monitor Trypanosoma cruzi parasitemia in patients with chronic Chagas disease cardiomyopathy: A substudy from the BENEFIT trial. Acta Trop. 2013 Jan;125(1):23-31.

Murcia L.; Carrilero B.; Muñoz MJ.; Iborra MA.; Segovia M. Usefulness of PCR for monitoring benznidazole response in patients with chronic Chagas' disease: A prospective study in a non-disease-endemic country. J Antimicrob Chemother 2010; 65:8 (1759-1764)

Nakazawa M.; Rosa DS.; Pereira VR.;Moura MO.; Furtado VC.; Souza WV.; Barros MN.;Abath FG.; Gomes YM. Excretory-secretory antigens of Trypanosoma cruzi are potentially useful for serodiagnosis of chronic Chagas' disease. Clin Diagn Lab Immunol. 2001 Sep;8(5):1024-7.

Olgin J.; Zipes DP. Specific Arrhythmias: Diagnosis and Treatment. In: Bonow RO. Braunwald's Heart Disease - A Textbook of Cardiovascular Medicine, 9th ed. St. Louis: Elsevier; 2011. p. 781-824

Peinado R. Presíncope: ¿un síntoma con igual significado pronóstico que el síncope? [editorial]. Rev Esp Cardiol 2004;57(7):613-6

Perez-ayala A.; Perez-molina JA.; Norman F.; Monge-mailló B.; Faro MV.; Lopez-velez R. Gastro-intestinal Chagas disease in migrants to Spain: prevalence and methods for early diagnosis. Ann. Trop. Med. Parasitol 2011; 105(1): 25-9



|                                                                                   |                                                                      |  |
|-----------------------------------------------------------------------------------|----------------------------------------------------------------------|--|
|  | <b>PROTOCOLOS DE INVESTIGACIÓN</b><br><br><b>RED CHAGAS COLOMBIA</b> |  |
| Elaborado por:<br>Juan David Ramírez<br>Coordinador CCDM<br>RED CHAGAS COLOMBIA   | Revisado por:<br>Zulma Cucunubá<br>Gerente<br>RED CHAGAS COLOMBIA    |  |

Petti M.; Viotti R.; Armenti A.; Bertocchi G.; Lococo B.; Álvarez MG. et. al. Predictores de insuficiencia cardiaca en la miocardiopatía chagásica crónica con disfunción asintomática del ventrículo izquierdo. *Rev Esp Cardiol.* 2008;61(2):116-22

Pinazo M.J.; Muñoz J.; Posada E.; López-Chejade P.; Gállego M.; Ayala E. et. al. Tolerance of benznidazole in treatment of Chagas' disease in adults. *Antimicrob Agents Chemother* 2010; 54: 4896-9

Prata A. Clinical and epidemiological aspects of Chagas disease[review]. *Lancet Infect. Dis* 2000; 1: 92–100

Ramírez JD.; Guhl F.; Rendón LM.; Rosas F.; Marin-Neto JA. Chagas Cardiomyopathy Manifestations and Trypanosoma cruzi Genotypes Circulating in Chronic Chagasic Patients. *PLoS Negl Trop Dis* 2010; 4 (11).

Ramírez JD.; Guhl F.; Umezawa ES.; Morillo CA.; Rosas F.; Marin-Neto JA.; Restrepo S. Evaluation of adult chronic Chagas' heart disease diagnosis by molecular and serological methods. *J Clin Microbiol.* 2009 Dec; 47(12):3945-51.

Rassi A Jr.; Rassi A.; Little WC.; Xavier SS.; Rassi SG.; Rassi AG. et. al. Development and Validation of a Risk Score for Predicting Death in Chagas' Heart Disease. *N Engl J Med* 2006;355:799-808.

Rassi A Jr.; Rassi A.; Rassi SG. Studies Predictors of Mortality in Chronic Chagas Disease: A Systematic Review of Observational. *Circulation.* 2007;115:1101-1108

Rassi A.; Rezende JM. Estudo clínico-radiológico do esôfago e dos cólons na fase aguda da doença de Chagas com relato de três casos de remissão espontânea de aperistalse do esôfago do grupo I. *Rev. Soc. Bras. Med. Trop* 2011; 44(1):70-75.

Roitt I. *Roitt Inmunología.* Buenos aires: Argentina. Editorial Médica Panamericana : 2008

Rosas F.; Guhl F.; Velasco V.; Jumbo L.; Jaramillo C.; Rodriguez D. et. al. Morbilidad de la enfermedad de Chagas en fase crónica en Colombia. Detección de pacientes chagásicos con cardiopatía en un área endémica del departamento de Boyacá. *Rev Col Cardiol* 2002; 9: 349-359.

Sackett DL. On the determinants of academic success as a clinician scientist. *Clin Invest Med* 2001;24(2):94e100.

Salles G.; Xavier S.; Sousa A.; Hasslocher-Moreno A.; Cardoso C. Prognostic Value of QT Interval Parameters for Mortality Risk Stratification in Chagas' Disease: Results of a Long-Term Follow-Up Study. *Circulation.* 2003;108:305-312.

Secretaria de salud de México D.F. Guía para la Elaboración de Protocolos de Investigación Operativa en Calidad. Dirección General de Calidad y Educación en

|                                                                                   |                                                                      |  |
|-----------------------------------------------------------------------------------|----------------------------------------------------------------------|--|
|  | <b>PROTOCOLOS DE INVESTIGACIÓN</b><br><br><b>RED CHAGAS COLOMBIA</b> |  |
| Elaborado por:<br>Juan David Ramírez<br>Coordinador CCDM<br>RED CHAGAS COLOMBIA   | Revisado por:<br>Zulma Cucunubá<br>Gerente<br>RED CHAGAS COLOMBIA    |  |

salud. Dirección de Planeación e Innovación para la calidad. Subdirección de investigación en calidad. Abril 2002.

Solari A.; Ortíz S.; Soto A.; Arancibia C.; Campillay R.; Contreras M. et al. Treatment of Trypanosoma cruzi-infected children with nifurtimox: A 3 year follow-up by PCR Journal of Antimicrobial Chemotherapy 2001 48:4.

Storch W. Immunofluorescence in clinical immunology: a primer and atlas. Berlín: Alemania Ediciones Birkhauser; 2000.

Suárez Pérez EL.; Pérez Cardona CM. Basic components in the development of research proposals in health sciences. P R Health Sci J. 1999; 18 Suppl A.; 1-49.

The WHO Adverse Reaction Terminology – WHO ART. Terminology for coding clinical information in relation to drug therapy 2005.

Umezawa ES.; Nascimento MS.; Kesper NJ.; Coura.; JR.; Borges-Pereira.; J.; Junqueira.; ACV.; et al. Immunoblot Assay Using Excreted-Secreted antigens of Trypanosoma cruzi in Serodiagnosis of Congenital.; Acute and Chronic Chagas' Disease. Journal of Clinical Microbiology.; 34(9): 2143-7.; 1996.

Valencia C.N.; Mancilla M.; Ramos D.; Zulantay L.; Molina M.; Torres A. et al. Tratamiento de la enfermedad de Chagas crónica en Chile. Efectos adversos de Nifurtimox. Rev. Ibero-Latinoam. Parasitol 2012;71: 97-108.

Venkatesan P.; Wakelin D. ELISAs for parasitologists: or lies.; damned lies and ELISAs. Parasitol Today. 1993;9:229-32

Villar JC. Desenlaces clínicos de sujetos con infección crónica por Trypanosoma cruzi tratados o no con agentestripanocidas. Un metaanálisis de estudios observacionales. MEDUNAB 2002; 5(15): 166-73.

Villar JC.; Congreso Medicina Tropical, Medellín, 2009

Viotti R.; Vigliano C.; Alvarez MG.; Lococo B.; Petti M. Impact of Aetiological Treatment on Conventional and Multiplex Serology in Chronic Chagas Disease. PLoS Negl Trop Dis 2012; 5(9): e1314.

Viotti R.; Vigliano C.; Lococo B.; Bertocchi G.; Petti M.; Alvarez MA. et. al. Long-Term Cardiac Outcomes of Treating Chronic Chagas Disease with Benznidazole versus No Treatment. A Nonrandomized Trial. Ann Intern Med. 2006;144:724-734.

Viotti RJ.; Vigliano C.; Laucella S.; Lococo B.; Petti M.; Bertocchi G. et. al. Value of echocardiography for diagnosis and prognosis of chronic Chagas disease cardiomyopathy without heart failure. Heart 2004;90:655–660.

World Health Organization WHO. Comités de farmacoterapia - Guía práctica. 2003.

|                                                                                   |                                                                          |  |
|-----------------------------------------------------------------------------------|--------------------------------------------------------------------------|--|
|  | <b>PROTOCOLOS DE<br/>INVESTIGACIÓN</b><br><br><b>RED CHAGAS COLOMBIA</b> |  |
| Elaborado por:<br>Juan David Ramírez<br>Coordinador CCDM<br>RED CHAGAS COLOMBIA   | Revisado por:<br>Zulma Cucunubá<br>Gerente<br>RED CHAGAS COLOMBIA        |  |

Yun O.; Lima M.A.; Ellman T.; Chambi W.; Castillo S.; Flevaud L. et. al. Feasibility, Drug Safety, and Effectiveness of Etiological Treatment Programs for Chagas Disease in Honduras, Guatemala, and Bolivia: 10-Year Experience of Médecins Sans Frontières. PLoS Negl Trop Dis 2009; 3: e488.

Zingales B.; Andrade SG.; Briones MRS.; Campbell DA.; Chiari E.; Fernandes O.; et al. (2009). A new consensus for Trypanosoma cruzi intraspecific nomenclature: second revision meeting recommends TcI to TcVI. Mem. Inst. Oswaldo Cruz 104: 1051–1054.

Zingales B.; Miles MA.; Campbell DA.; Tibayrenc M.; Macedo AM.; Teixeira MM.; et al. (2012) The revised Trypanosoma cruzi subspecific nomenclature: Rationale; epidemiological relevance and research applications. Infect Genet Evol 12: 240-253.

|                                                                                   |                                                                      |  |
|-----------------------------------------------------------------------------------|----------------------------------------------------------------------|--|
|  | <b>PROTOCOLOS DE INVESTIGACIÓN</b><br><br><b>RED CHAGAS COLOMBIA</b> |  |
| Elaborado por:<br>Juan David Ramírez<br>Coordinador CCDM<br>RED CHAGAS COLOMBIA   | Revisado por:<br>Zulma Cucunubá<br>Gerente<br>RED CHAGAS COLOMBIA    |  |

## ANEXO 1.

### MÉTODOS SEROLOGICOS. PROTOCOLO PARA TOMA, IDENTIFICACIÓN, CONSERVACIÓN y PROCESAMIENTO DE MUESTRAS PARA PRUEBAS SEROLOGICAS DE ENFERMEDAD DE CHAGAS

#### 1. Obtención de muestras de suero para pruebas parasitológicas

- Por punción venosa tomar 5 ml de sangre sin anticoagulante.
- Dejar retraer el coágulo a temperatura ambiente por 30 minutos.
- Centrifugar a 1.500 r.p.m. durante 10 minutos.
- Separar el suero en tubo o en un vial con tapa.
- Identificar el vial con los datos del paciente y el código correspondiente.

#### 2. Obtención de antígeno de *T. cruzi* para IFI:

Para obtener el antígeno de *T. cruzi* es necesario ejecutar el protocolo descrito a continuación:

- Tomar cepas de *T. cruzi* (epimastigotes) puras, obtenidas de cultivo en fase logarítmica de crecimiento.
- Filtrar el cultivo, en condiciones de completa asepsia utilizando gasa estéril.
- Centrifugar el sobrenadante producto de la filtración del cultivo, en tubo de polipropileno graduado de 50 mL, por 20 minutos a  $3.000 \pm 500$  r.p.m., descartar el sobrenadante con pipeta pasteur y lavar 4 veces con PBS pH 7.2+0.4 estéril o solución salina estéril al 0.85%. El sobrenadante del primer lavado debe centrifugarse y lavar con PBS pH 7.2+0.4 estéril o solución salina estéril al 0.85%.
- Posterior a el último lavado, resuspender el sedimento en Formol 1% y dejar 18 horas a  $4 \pm 2^\circ\text{C}$
- Centrifugar 20 minutos a  $3.000 \pm 500$  r.p.m. y lavar sedimento 3 veces con PBS pH 7.2+0.4 estéril o solución salina estéril al 0.85%.
- Llenar el tubo graduado que contiene el sedimento con el antígeno con aproximadamente 45 ml de PBS pH 7.2+0.4 estéril o solución salina estéril al 0.85%, homogenizar perfectamente en agitador de Mazini  $50 \pm 5$  rpm y proceder a realizar el recuento de parásitos contenido en la alícuota, colocando una gota de la suspensión (10 $\mu$ L) en la lámina fluorescencia de 18 pozos y observar en el Microscopio óptico con objetivo de 40X.
- Buscar que la concentración de parásitos en la suspensión final del antígeno contenga un promedio de 20 a 30 parásitos por campo en objetivo de 40X. Para diluir con PBS pH 7.2+0.4 estéril o solución salina estéril tanto como sea necesario, para obtener la concentración anteriormente mencionada.
- Distribuir la suspensión de antígeno convenientemente diluido, colocando aproximadamente  $0.01 \text{ mL} \pm 0.001 \text{ mL}$  ( $10 \pm 1 \mu\text{l}$ ) en cada pozo de la lámina para

|                                                                                   |                                                                      |  |
|-----------------------------------------------------------------------------------|----------------------------------------------------------------------|--|
|  | <b>PROTOCOLOS DE INVESTIGACIÓN</b><br><br><b>RED CHAGAS COLOMBIA</b> |  |
| Elaborado por:<br>Juan David Ramírez<br>Coordinador CCDM<br>RED CHAGAS COLOMBIA   | Revisado por:<br>Zulma Cucunubá<br>Gerente<br>RED CHAGAS COLOMBIA    |  |

IFI. Durante todo el proceso de dispensación la suspensión antigénica debe agitarse constantemente para evitar la sedimentación de los parásitos y distribuir con jeringa de insulina que tenga aguja recortada o con multirepetidora que proporcione el volumen mencionado, a razón de una gota ( $10 \pm 1 \mu\text{L}$ ) por círculo.

- Secar las láminas por 15 minutos a temperatura ambiente y luego colocarlas en Incubadora a  $37 \pm 1^\circ\text{C}$  por 30 minutos
- Retirar de la incubadora, dejar a temperatura ambiente por 10 minutos y empacar en paquetes de cinco (5) láminas en papel milano, teniendo cuidado al manipular la superficie de la lámina que contiene el antígeno.
- Almacenar las láminas de antígeno en bolsas de cierre hermético, que contengan silica gel para evitar la humedad, marcadas en su parte externa con un rótulo que contenga: la identificación del antígeno, fecha, número de lote y cantidad de láminas contenidas en la bolsa.
- Colocar las bolsas en un recipiente de cierre hermético que es sellado con cinta de enmascarar y también identificado con los datos antes mencionados, los cuales son almacenados en el Revco a  $-70^\circ\text{C}$ ,  $30 \pm 2^\circ\text{C}$  o en el cuarto frío  $-18 \pm 2^\circ\text{C}$ .

### 3. Obtención de antígeno De *T. cruzi* para ELISA

- Tomar cepas de *T. cruzi* (epimastigotes) puras, obtenidas de cultivo en fase logarítmica de crecimiento.
- Concentrar el cultivo transvasándolo a tubos Falcón de 50 ml y centrifugar a  $4^\circ\text{C}$ , 3.000 r.p.m. durante 20 minutos.
- Descartar el sobrenadante de cada uno de los frascos con pipeteador, para conservar la mayor cantidad de parásitos.
- Lavar el sedimento tres (3) veces con Solución Salina al 0.85 % durante 20 minutos a  $4^\circ\text{C}$  y 3.000 r.p.m, tener en cuenta que se debe descartar el sobrenadante como en el paso anterior.
- Pesar en balanza analítica todos los tubos Falcón vacíos con tapa, que serán usados para liofilización.
- Agrupar el sedimento obtenido de los lavados de todos los frascos Falcón en uno solo ó en un número adecuado de frascos previamente pesados dependiendo de la cantidad de sedimento obtenido, adicionar a cada uno de ellos 2 ml de Solución salina al 0.85 % y llevarlo a congelación por 18 horas a  $-70^\circ\text{C}$ .
- Liofilizar los sedimentos y recoger la totalidad del liofilizado, raspando las paredes del tubo con espátula y pesarlo. Obtener el peso final por diferencia del peso obtenido del tubo Falcón con el liofilizado menos el peso del tubo Falcón vacío.
- Reconstituir el sedimento con Solución Salina al 0,85% a  $4^\circ\text{C}$  con un volumen correspondiente a la décima parte. Es decir, el peso final en miligramos se divide entre 10.
- Seguidamente sonicar tres veces a 20 KHz durante 15 segundos, teniendo en cuenta de utilizar una cubeta de hielo para mantener la red de frío.

|                                                                                                                         |                                                                             |  |
|-------------------------------------------------------------------------------------------------------------------------|-----------------------------------------------------------------------------|--|
|  <p><b>RED CHAGAS</b><br/>Colombia</p> | <p><b>PROTOCOLOS DE INVESTIGACIÓN</b></p> <p><b>RED CHAGAS COLOMBIA</b></p> |  |
| <p>Elaborado por:<br/>Juan David Ramírez<br/>Coordinador CCDM<br/>RED CHAGAS COLOMBIA</p>                               | <p>Revisado por:<br/>Zulma Cucunubá<br/>Gerente<br/>RED CHAGAS COLOMBIA</p> |  |

- Posteriormente para completar la fragmentación del antígeno llevar la preparación a nitrógeno líquido (-196° C) durante 9 veces, teniendo en cuenta de asegurar el tubo Falcón con una cuerda triple, de tal forma que el nitrógeno no la pueda romper. En cada uno de estos pasos dejar descongelar totalmente la preparación y luego si introducirla en la bombona de nitrógeno líquido.
- Finalmente distribuir en alícuotas de 150 ul, determinar su concentración de proteínas por el método de Bradford y marcar cada una de las alícuotas con la fecha de preparación y su concentración de proteínas.
- Almacenar los viales obtenidos a -20° C.

#### 4. Prueba IFI para determinación de anticuerpos IgG anti-*T.cruzi*

- Rotular las microplacas de fondo en U con los números correspondientes a las muestras a procesar (8 muestras por microplaca).
- Agregar un volumen (20µl ó 25µl) de PBS pH 7.2 en todas las celdas de la microplaca.
- Agregar (20µl ó 25µl) de las muestras incluyendo inicialmente los sueros controles internos de referencia (+) y (-). Posteriormente agregar el mismo volumen de cada una de las muestras de suero a procesar.
- Mezclar completamente y preparar las diluciones seriadas al doble por transferencia de (20µl ó 25µl..) a cada pozo sucesivo. Descartar el volumen final (20µl ó 25µl..) de la última dilución. Obtendremos las diluciones (1/2, 1/4, 1/8, 1/16, 1/32, 1/64, 1/128, 1/256, 1/512, 1/1024, 1/2048...) de la siguiente forma:

- Diluciones

|               |     |                                                                                     |                          |                          |                          |                          |                          |                          |                          |
|---------------|-----|-------------------------------------------------------------------------------------|--------------------------|--------------------------|--------------------------|--------------------------|--------------------------|--------------------------|--------------------------|
|               |     | <b>(+)</b>                                                                          | <b>(+)</b>               | <b>(-)</b>               | <b>S1</b>                | <b>S2</b>                | <b>S3.....</b>           |                          |                          |
| <b>1/2</b>    | 1   |  | <input type="checkbox"/> | <input type="checkbox"/> | <input type="checkbox"/> | <input type="checkbox"/> | <input type="checkbox"/> | <input type="checkbox"/> | <input type="checkbox"/> |
|               | 2   |  | <input type="checkbox"/> | <input type="checkbox"/> | <input type="checkbox"/> | <input type="checkbox"/> | <input type="checkbox"/> | <input type="checkbox"/> | <input type="checkbox"/> |
| <b>1/4</b>    | 3   | .                                                                                   | <input type="checkbox"/> | <input type="checkbox"/> | <input type="checkbox"/> | <input type="checkbox"/> | <input type="checkbox"/> | <input type="checkbox"/> | <input type="checkbox"/> |
|               | 4   | .                                                                                   | <input type="checkbox"/> | <input type="checkbox"/> | <input type="checkbox"/> | <input type="checkbox"/> | <input type="checkbox"/> | <input type="checkbox"/> | <input type="checkbox"/> |
|               | 5   | .                                                                                   | <input type="checkbox"/> | <input type="checkbox"/> | <input type="checkbox"/> | <input type="checkbox"/> | <input type="checkbox"/> | <input type="checkbox"/> | <input type="checkbox"/> |
|               | 6   | .                                                                                   | <input type="checkbox"/> | <input type="checkbox"/> | <input type="checkbox"/> | <input type="checkbox"/> | <input type="checkbox"/> | <input type="checkbox"/> | <input type="checkbox"/> |
|               | 7   | .                                                                                   | <input type="checkbox"/> | <input type="checkbox"/> | <input type="checkbox"/> | <input type="checkbox"/> | <input type="checkbox"/> | <input type="checkbox"/> | <input type="checkbox"/> |
|               | 8.  |  | <input type="checkbox"/> | <input type="checkbox"/> | <input type="checkbox"/> | <input type="checkbox"/> | <input type="checkbox"/> | <input type="checkbox"/> | <input type="checkbox"/> |
| <b>1/2048</b> | 9   | .                                                                                   | <input type="checkbox"/> | <input type="checkbox"/> | <input type="checkbox"/> | <input type="checkbox"/> | <input type="checkbox"/> | <input type="checkbox"/> | <input type="checkbox"/> |
|               | 10. |  | <input type="checkbox"/> | <input type="checkbox"/> | <input type="checkbox"/> | <input type="checkbox"/> | <input type="checkbox"/> | <input type="checkbox"/> | <input type="checkbox"/> |

|                                                                                   |                                                                      |  |
|-----------------------------------------------------------------------------------|----------------------------------------------------------------------|--|
|  | <b>PROTOCOLOS DE INVESTIGACIÓN</b><br><br><b>RED CHAGAS COLOMBIA</b> |  |
| Elaborado por:<br>Juan David Ramírez<br>Coordinador CCDM<br>RED CHAGAS COLOMBIA   | Revisado por:<br>Zulma Cucunubá<br>Gerente<br>RED CHAGAS COLOMBIA    |  |

- Preparar las láminas portadoras del Ag hasta que alcancen la temperatura ambiente. Roturarlas con el número del código de las muestras.
- Dispensar 12 ul de cada una de las diluciones realizadas sobre los pozos de las láminas de Ag. Empezar de la más diluida (1/2048) a la más concentrada (1/8).

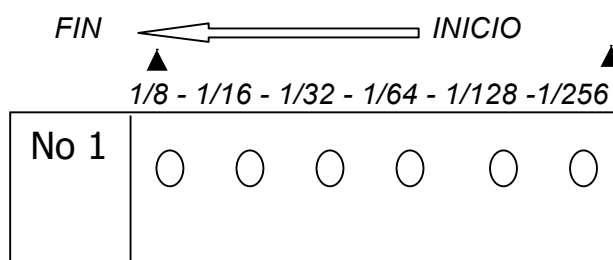

- Colocar las láminas en cámara húmeda a 37° C de 45 - 60 minutos en posición perfectamente horizontal evitando movimientos bruscos.
- Lavar cada lámina con PBS pH 7.2, utilizando un frasco lavador.
- Lavar las láminas en PBS pH 7.2 por 5 minutos por inmersión, utilizando cubetas de coloración y rotación suave. Este paso debe realizarse 2 veces.
- Dejar secar las láminas a temperatura ambiente o utilizando un ventilador suave. No utilizar calor
- Prepara el conjugado previamente titulado y cubrir las áreas circulares de las láminas con 12 ul de conjugado anti- IgG, diluido en Azul de Evans 1:1.000.
- Incubar nuevamente las láminas en cámara húmeda a 37° C por 45 - 60 minutos.
- Lavar cada lámina con PBS pH 7.2, utilizando un frasco lavador.
- Lavar las láminas en PBS pH 7.2 durante 5 minutos por inmersión, utilizando cubetas de coloración y rotación suave. Este paso debe realizarse 2 veces.
- Realizar un último lavado con agua destilada por 5 minutos por inmersión, utilizando cubetas de coloración y rotación suave.
- Secar las láminas con aire comprimido muy suavemente, con ventilador o dejarlas secar espontáneamente (no exponer a la luz para evitar pérdida de fluorescencia) y agregarles 1 gota de glicerina bufferada pH 9.0.

|                                                                                   |                                                                      |  |
|-----------------------------------------------------------------------------------|----------------------------------------------------------------------|--|
|  | <b>PROTOCOLOS DE INVESTIGACIÓN</b><br><br><b>RED CHAGAS COLOMBIA</b> |  |
| Elaborado por:<br>Juan David Ramírez<br>Coordinador CCDM<br>RED CHAGAS COLOMBIA   | Revisado por:<br>Zulma Cucunubá<br>Gerente<br>RED CHAGAS COLOMBIA    |  |

- Colocar laminillas de 22 x 60 mm para cubrir completamente cada uno de los pozos de la lámina.
- Observar al microscopio de fluorescencia con objetivo de 40X.
- **Lectura** : Siempre se debe montar la reacción con un suero control positivo, un suero control negativo y un control de PBS pH 7.2
  - **Reacción positiva:** Los parásitos se observan de color verde manzana brillante tanto el cuerpo como los flagelos.
  - **Reacción negativa:** Los parásitos se observan de color rojo ladrillo opaco, sin fluorescencia.
  - **Control de PBS pH 7.2:** Los parásitos se observan de color rojo.
- **Interpretación de la técnica:** Se considera como positivo para enfermedad de Chagas un título mayor o igual a 1/32.

##### 5. Técnica ELISA para la determinación de anticuerpos IgG anti-*T cruzi*

Para realizar las pruebas de ELISA para diagnóstico de *T. cruzi*, es necesario llevar a cabo los siguientes procedimientos:

- **Sensibilización del antígeno.** Adicionar en cada uno de los pozos un volumen de 100µl de antígeno en concentración óptima, incubar por 3 horas en cámara húmeda a 4°C. Posteriormente, realizar tres lavados en el lavador de microplacas, utilizando la tarjeta de 4 lavados x 12. De una u otra forma, los lavados se deben realizar con solución de trabajo PBS-Tween. 0.1 M pH 7,4 para eliminar restos del antígeno aplicado y evitar un cambio de pH en la reacción.
- **Antígeno de concentración antigénica óptima o de trabajo:** Realizar dilución en buffer carbonato 0.05 M pH 9.6, cuya función principal es estabilizar el antígeno en la dilución óptima de trabajo. Esta concentración para la técnica de Tripanosomiasis es de 7,5 µg/ml
- **Adición de la muestra.** Agregar 100 µl de la dilución óptima de cada una de las muestras de los pacientes en estudio y los respectivos controles conocidos. Dejar 2 horas de incubación en cámara húmeda a temperatura ambiente. Realizar los lavados de la placa de la misma forma como se describió en el numeral 1
- **Dilución óptima de la muestra:** Las muestras problemas deben ser diluidas de la 1:1000 (10 µl de muestra en 10 ml de buffer PBS-Tween). Cada muestra en su dilución respectiva debe procesarse por triplicado.



|                                                                                                                         |                                                                             |  |
|-------------------------------------------------------------------------------------------------------------------------|-----------------------------------------------------------------------------|--|
|  <p><b>RED CHAGAS</b><br/>Colombia</p> | <p><b>PROTOCOLOS DE INVESTIGACIÓN</b></p> <p><b>RED CHAGAS COLOMBIA</b></p> |  |
| <p>Elaborado por:<br/>Juan David Ramírez<br/>Coordinador CCDM<br/>RED CHAGAS COLOMBIA</p>                               | <p>Revisado por:<br/>Zulma Cucunubá<br/>Gerente<br/>RED CHAGAS COLOMBIA</p> |  |

- **Adición del conjugado.** Adicionar 100 µl de la dilución óptima del conjugado anti - IgG ligado a fosfatasa alcalina en cada uno de los pozos. Incubar por 18 horas en cámara húmeda a 4 °C y posteriormente, realizar tres lavados como se indicó antes.
- **Dilución óptima del conjugado (anti - IgG humana unido a fosfatasa alcalina).** El conjugado utilizado (anti - IgG humana unido a fosfatasa alcalina comercial) se debe titular previamente para obtener la dilución óptima de trabajo. Esta titulación se realiza con controles de referencia conocidos, teniendo en cuenta de utilizar títulos desde 1:1000 hasta 1:12000. Las diluciones se realizan en Buffer PBS-Tween.
- **Adición del sustrato cromogénico.** Adicionar 100 µl de la dilución del sustrato (Para-nitro-fenil-fosfato – Dietanolamina) e incubar en cámara húmeda por 30 minutos a temperatura ambiente.
- **Interrupción de la reacción.** Detener la reacción con 25 µl de hidróxido de sodio (NaOH) 3 M. El hidróxido de sodio también proporciona a la reacción inmunoenzimática un aumento de la intensidad y estabilidad del tono amarillo que le confiere el cromógeno a la reacción.
- **Lectura:** Realizar la lectura de la densidad óptica de cada una de las muestras, para lo cual se utiliza un fotocolorímetro Multiskan a una longitud de onda de 405 nm. La muestra restante luego del procesamiento de la misma será manejada así: 0±4°C por 5 días a -18±2 °C (cuarto frío) temperatura donde se encuentra el banco de muestras
- **Preparación de Controles**
  - **Controles Internos:** Se utilizarán los siguientes controles internos:
    - Blanco de reactivos: con cada lote de muestras deben analizarse un blanco de reactivos en los cuales la muestra es reemplazada por un volumen equivalente de conjugado. Este blanco debe ser procesado de igual forma que las muestras.
    - Control de antígeno: con cada lote de muestras deben analizarse un control de antígeno en los cuales la muestra es reemplazada por un volumen equivalente de antígeno. Este blanco debe ser procesado de igual forma que las muestras.
    - Control de muestras: para validar la prueba, con cada lote de muestras debe determinarse simultáneamente cuatro controles de referencia de muestras de suero de densidades ópticas conocidas (dos positivas y dos negativas), cuatro de líquido cefalorraquídeo (dos positivos y dos negativos), cuatro de papel filtro (dos positivas y dos negativas) o cuatro de humor vítreo (dos positivas y dos negativas), dependiendo del montaje que se vaya a realizar. El registro de los resultados de estos controles se lleva a cabo en la tabla de trazabilidad ubicada en el los cuaderno de trabajo correspondientes a cada patología, de acuerdo con las instrucciones del lomo.

|                                                                                   |                                                                      |  |
|-----------------------------------------------------------------------------------|----------------------------------------------------------------------|--|
|  | <b>PROTOCOLOS DE INVESTIGACIÓN</b><br><br><b>RED CHAGAS COLOMBIA</b> |  |
| Elaborado por:<br>Juan David Ramírez<br>Coordinador CCDM<br>RED CHAGAS COLOMBIA   | Revisado por:<br>Zulma Cucunubá<br>Gerente<br>RED CHAGAS COLOMBIA    |  |

- **Control Externo:** La exactitud de la prueba de ELISA para cisticercosis y tripanosomiasis se evalúa con el Control de Calidad Externo Nacional, con una frecuencia de dos evaluaciones anuales. Para IFI Chagas también se cuenta con un Control de Calidad Externo Internacional, también con una frecuencia de dos evaluaciones anuales, tal como se evidencia en los reportes.

- **Interpretación de los resultados**

Las densidades ópticas o absorbancias de muestras de suero menores al punto de corte (0,300) son consideradas como negativas y las absorbancias mayores o iguales a este punto, son consideradas como positivas.

#### **6. Técnica HAI para la determinación de anticuerpos IgG anti-*T cruzi***

Se realizará la prueba de HAI mediante el uso del Kit Chagatest.(Wiener Lab)

#### **7. Técnica TESA-BLOT para la determinación de anticuerpos IgG anti-*T cruzi***

Se realizará mediante el uso de la prueba comercial TesaBlot(Enfermedad de Chagas), comercializada por Biomeriux.

|                                                                                   |                                                                      |  |
|-----------------------------------------------------------------------------------|----------------------------------------------------------------------|--|
|  | <b>PROTOCOLOS DE INVESTIGACIÓN</b><br><br><b>RED CHAGAS COLOMBIA</b> |  |
| Elaborado por:<br>Juan David Ramírez<br>Coordinador CCDM<br>RED CHAGAS COLOMBIA   | Revisado por:<br>Zulma Cucunubá<br>Gerente<br>RED CHAGAS COLOMBIA    |  |

## ANEXO 2.

### METODOS MOLECULARES.

#### PROTOCOLO PARA TOMA DE MUESTRA, CONSERVACION Y PROCESAMIENTO DE PRUEBAS MOLECULARES PARA DETECCIÓN DE *Trypanosoma cruzi*

##### A. TOMA DE MUESTRA DE SANGRE

- Ubicar el paciente en una posición cómoda para la toma de muestra
- Marcar y rotular con los datos del paciente y el código correspondiente.
- Inspeccionar la vena que se va a puncionar.
- Realizar asepsia con alcohol sobre el sitio de la punción.
- Colocar el torniquete con suficiente tensión sin excederse
- Realizar la punción sobre la vena
- Tomar primero la muestra de sangre en tubo seco tapa amarilla.
- Tomar dos tubos con EDTA tapa lila de 10 ml.
- Indicar al paciente que debe hacer presión en el sitio punzado y colocar algodón sobre la herida de la punción.

Nota: Es indispensable tener en cuenta las normas de Bioseguridad y barreras de protección necesarias durante el proceso de toma de muestra.

##### B. CONSERVACION DE LA MUESTRA DE SANGRE PARA PCR

- Tomar los dos tubos tapa lila y mezclar la sangre en un tubo falcón de 50ml.
- Anadir volumen igual al obtenido de clorhidrato de guanidina 6M-EDTA 0.2M
- Mezclar durante 15 minutos por agitación suave
- Conservar las muestra a temperatura ambiente hasta la extracción de ADN.

Nota: Si la extracción de ADN es posterior a seis meses se debe refrigerar la muestra a 4°C.

##### C. PREPARACION DE CLORHIDRATO DE GUANIDINA

- Pesar 22,33 g de EDTA 0,2M.
- Agregar agua destilada hasta 300 ml.
- Agitar hasta disolver completamente.
- Agregar 10 perlas de hidróxido de sodio y 286,52 g de clorhidrato de guanidina 6M.
- Completar con agua destilada hasta 500 ml.
- Cuadrar pH a 8.0 con hidróxido de sodio al 40 %.
- Esterilizar a 15 libras de presión (121°C) durante 15 minutos
- Dejar enfriar y almacenar en nevera a 4°C

|                                                                                   |                                                                      |  |
|-----------------------------------------------------------------------------------|----------------------------------------------------------------------|--|
|  | <b>PROTOCOLOS DE INVESTIGACIÓN</b><br><br><b>RED CHAGAS COLOMBIA</b> |  |
| Elaborado por:<br>Juan David Ramírez<br>Coordinador CCDM<br>RED CHAGAS COLOMBIA   | Revisado por:<br>Zulma Cucunubá<br>Gerente<br>RED CHAGAS COLOMBIA    |  |

## D. CONTROLES

### 1. CEPAS CONTROL

Utilizar las siguientes cepas control:

- **DTU TcI:** CG
- **DTU TcII:** PG98
- **DTU TcIII:** CM17
- **DTU TcIV:** CANIII
- **DTU TcV :** MN cl 2
- **DTU TcVI:** CI Brener

### 2. CONTROL INTERNO DE AMPLIFICACIÓN

- Para mejorar la precisión de la cuantificación se incorporará al ensayo un plásmido recombinante lineal como estándar interno (IAC) que se agrega a la muestras de sangre original y se utiliza para normalizar el valor crudo de la carga parasitaria, según el rendimiento de la extracción de ADN de la muestra sanguínea y la eficiencia de amplificación (Duffy *et al.*, 2009).

### 3. CONTROLES DE EXTRACCIÓN Y DE REACCIÓN

- Al realizar la extracción de ADN se utilizará como control de extracción agua en lugar de muestra.
- Para todas las reacciones de PCR se utilizará como control negativo ADN obtenido de pacientes sanos, como control blanco se usará agua en lugar de ADN. Adicionalmente, se someterá a amplificación el control de extracción.

## E. EXTRACCION DE ADN DE CONTROLES

1. Contaminar muestras de sangre en clorhidrato de guanidina de un paciente control sano con  $10^6$  parásitos (epimastigotes de las cepas utilizadas como control) y realizar diluciones seriadas, antes de la extracción de ADN.
2. Realizar extracción de ADN de cada una de las diluciones de sangre contaminada con parásitos mediante el kit comercial (High Pure PCR Template preparation Kit, Roche Applied Science) ó por extracción automatizada.
3. Realizar diluciones seriadas de las diluciones de ADN extraído en el paso 2.
4. Realizar extracción de de ADN de cepas control de *T.cruzi* obtenidas de cultivo en medio BHI en fase logarítmica de crecimiento.

|                                                                                   |                                                                      |  |
|-----------------------------------------------------------------------------------|----------------------------------------------------------------------|--|
|  | <b>PROTOCOLOS DE INVESTIGACIÓN</b><br><br><b>RED CHAGAS COLOMBIA</b> |  |
| Elaborado por:<br>Juan David Ramírez<br>Coordinador CCDM<br>RED CHAGAS COLOMBIA   | Revisado por:<br>Zulma Cucunubá<br>Gerente<br>RED CHAGAS COLOMBIA    |  |

## F. EXTRACCIÓN DE ADN DE MUESTRAS

1. Realizar extracción de ADN de cada de sangre en clorhidrato de guanidina 6M mediante el kit comercial (High Pure PCR Template preparation Kit, Roche Applied Science) ó por extracción automatizada.

## G. AMPLIFICACIÓN DE ADN MEDIANTE PCR-RT CON SONDAS Taq-Man

Los ensayos de PCR se realizarán en el termociclador ABI Prism 7500 Fast System y el análisis de los resultados se realizará mediante el software Software High Resolution Melt (HRM) v3.0. El procedimiento para la amplificación y cuantificación de ADN de *T. cruzi* se describe a continuación:

1. Para un volumen final de 20ul, realizar la mezcla de reacción añadiendo 10 ul de Master Mix Taqman, 2 ul de ADN y los iniciadores cruzi1/cruzi2 y la sonda cruzi 3, para amplificación de ADN nuclear y los iniciadores kDNA Fw/kDNA Rv y la sonda kDNA P, para amplificación de ADN de Kinetoplasto (Moreira et al., 2012). Los programas de ciclaje así como las secuencias se relacionan en la Tabla 1.
2. Añadir a la mezcla de reacción 2 ul de las diluciones de ADN extraído de las cepas control mencionadas previamente realizar curvas de amplificación desde 1 parasito/mL hasta 10<sup>5</sup> parásitos/mL.
3. Añadir a la mezcla de reacción 2 ul de las diluciones de ADN extraído de la Cepa CG de TcI realizar curva estándar para cuantificación desde 10<sup>-2</sup> a 10<sup>5</sup> parásitos/mL.
4. Añadir a la mezcla de reacción 2 ul de ADN obtenido de las muestras de pacientes con enfermedad de Chagas y realizar detección y cuantificación de *T. cruzi*.

| Primers              | Secuencia                     | Programa de Ciclaje                                     |
|----------------------|-------------------------------|---------------------------------------------------------|
| cruzi 1<br>(Forward) | ASTCGGCTGATCGTTTTCGA          | <b>40 ciclos :</b><br>95 °C x 15 min.<br>58 °C x 2 min. |
| cruzi 2<br>(Reverse) | AATTCCTCCAAGCAGCGGATA         |                                                         |
| cruzi 3<br>(Sonda)   | FAM-CACACACTGGACACCAA-NFQ-MGB |                                                         |
| kDNA Fw<br>(Forward) | GGGCGTTCAAATTTTG              | 50 °C x 2 min.<br>95 °C x 10 min.                       |
| kDNA                 | CAATCGAACCCACCT               |                                                         |

|                                                                                   |                                                                      |  |
|-----------------------------------------------------------------------------------|----------------------------------------------------------------------|--|
|  | <b>PROTOCOLOS DE INVESTIGACIÓN</b><br><br><b>RED CHAGAS COLOMBIA</b> |  |
| Elaborado por:<br>Juan David Ramírez<br>Coordinador CCDM<br>RED CHAGAS COLOMBIA   | Revisado por:<br>Zulma Cucunubá<br>Gerente<br>RED CHAGAS COLOMBIA    |  |

|                |                                      |                                                         |
|----------------|--------------------------------------|---------------------------------------------------------|
| Rv(Reverse)    |                                      | <b>40 ciclos :</b><br>95 °C x 15 min.<br>60 °C x 2 min. |
| kDNA P (Probe) | FAM-TCATGCATCTCCCCCGTACATTATTT-TAMRA |                                                         |
| IACtq          | VIC-AGCATCTGTTCTTGAAGGT-NFQ-MGB      |                                                         |

#### H. GENOTIPIFICACIÓN DE *T. cruzi*

La Genotipificación en sus seis DTU, se realizará mediante los algoritmos propuestos por Ramírez et al., 2010 y Burgos et al., 2010. Utilizando como marcadores moleculares: SL-IR, 24Sa-rDNA y A10, cuyas secuencias de iniciadores se relacionan en la Tabla 2 y en la Figura 1..

**Tabla 2. Iniciadores para genotipificación.**

| Marcador Molecular | Primers                                                                                                                            |
|--------------------|------------------------------------------------------------------------------------------------------------------------------------|
| SL-IR              | <b>TCC:</b> CCC CCC TCC CAG GCC ACA CTG<br><b>TC1:</b> GTG TCC GCC ACC TCC TTCGGG CC<br><b>TC2 :</b> CCT GCA GGC ACA CGT GTG TGT G |
| 24Sa-rDNA          | <b>D71:</b> 5-AAG GTG CGT CGA CAG TGT GG-3<br><b>D72:</b> 5- TTT TCA GAA TGG CCG AAC AGT-3                                         |
| A10                | <b>Pr1:</b> CCGCTAAGCAGTTCTGTCCATA<br><b>P6</b> GTGATCGCAGGAAACGTG                                                                 |

|                                                                                                                         |                                                                             |  |
|-------------------------------------------------------------------------------------------------------------------------|-----------------------------------------------------------------------------|--|
|  <p><b>RED CHAGAS</b><br/>Colombia</p> | <p><b>PROTOCOLOS DE INVESTIGACIÓN</b></p> <p><b>RED CHAGAS COLOMBIA</b></p> |  |
| <p>Elaborado por:<br/>Juan David Ramírez<br/>Coordinador CCDM<br/>RED CHAGAS COLOMBIA</p>                               | <p>Revisado por:<br/>Zulma Cucunubá<br/>Gerente<br/>RED CHAGAS COLOMBIA</p> |  |

**Figura 1. Algoritmo de marcadores moleculares para genotipificación (Modificado por Ramírez JD, 2013, a partir de Ramírez et al., 2010).**

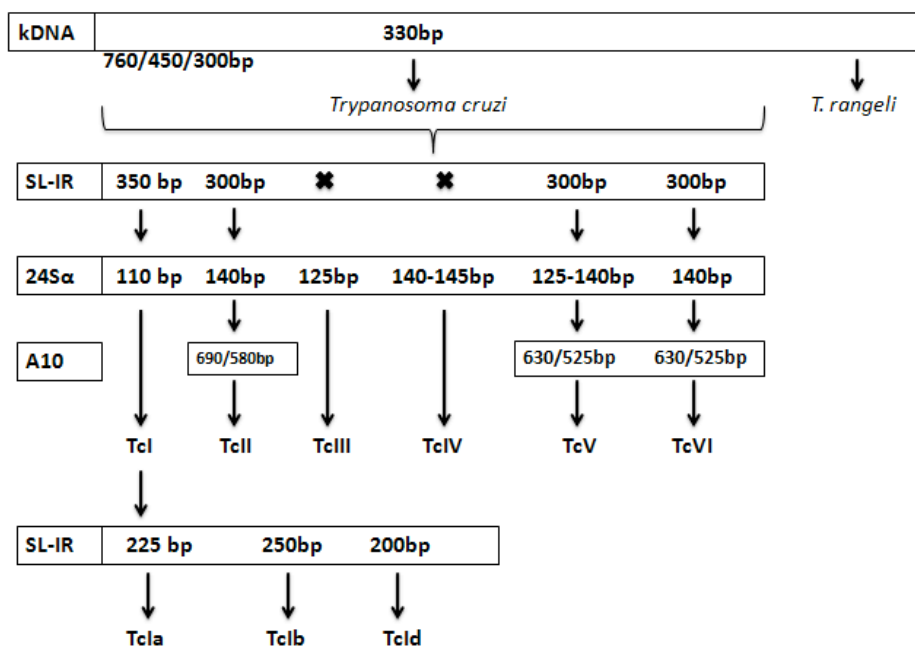

Supplement: pntd.0004997.s007.pdf [file pntd.0004997.s007.pdf]
